# Supplementary material for: Solvent dependent ligand transformation in a dinuclear copper(ii) complex of a compartmental Mannich-base ligand: synthesis, characterization, bio-relevant catalytic promiscuity and magnetic study
Source: Royal Society of Chemistry journal article supplement (doi:10.1039/c5ra05776k), 2015-01-01
Supplement: c5ra05776k1.pdf [file c5ra05776k1.pdf]

## Supplementary Information

### Solvent Dependent Ligand Transformation in a Dinuclear Copper(II) Complex of a Compartmental Mannich-base Ligand: Synthesis, Characterization, Bio-relevant Catalytic Promiscuity and Magnetic study

Ishani Majumder,<sup>a</sup> Prateeti Chakraborty,<sup>a</sup> Sudhanshu Das,<sup>a</sup> Hulya Kara,<sup>b</sup> Shymal Kumar Chattopadhyay,<sup>c</sup> Ennio Zangrando,<sup>d</sup> and Debasis Das<sup>\*,a</sup>

<sup>a</sup>Department of Chemistry, University of Calcutta, 92, A. P. C. Road, Kolkata – 700009, India

<sup>b</sup>Department of Physics, Faculty of Science and Art, Balikesir University, 10145 Balikesir, Turkey

<sup>c</sup>Department of Chemistry, IEST Shibpur, Howrah, India

<sup>d</sup>Department of Chemical and Pharmaceutical Sciences, University of Trieste, Via L. Giorgieri 1, 34127 Trieste, Italy

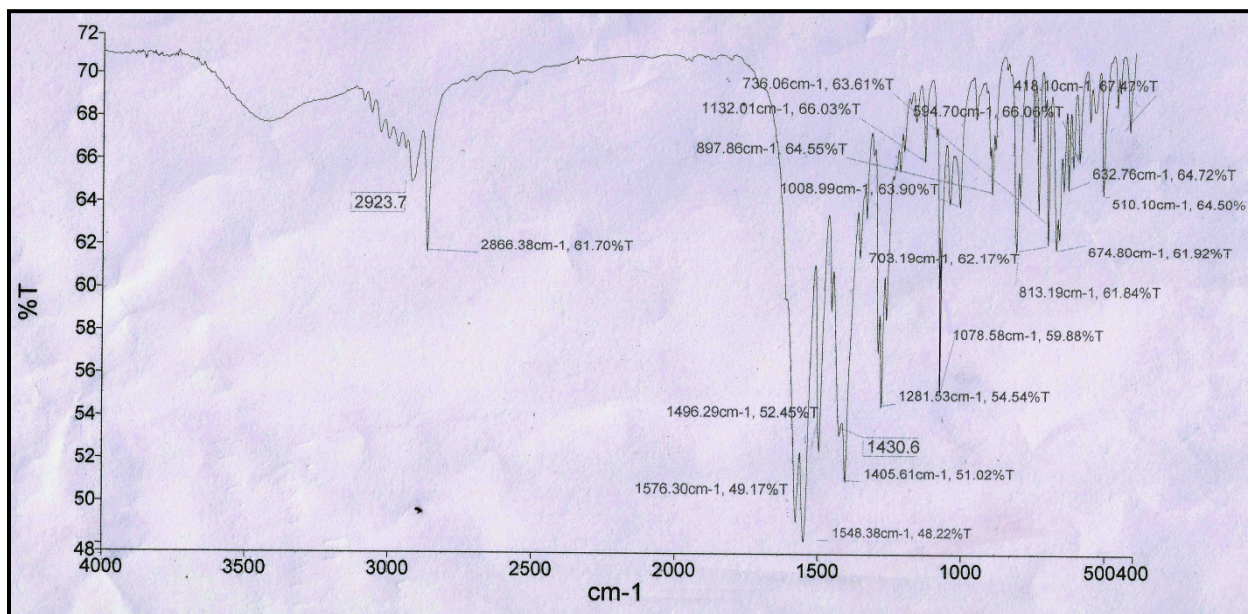

Figure S1. FTIR spectrum of complex 1.

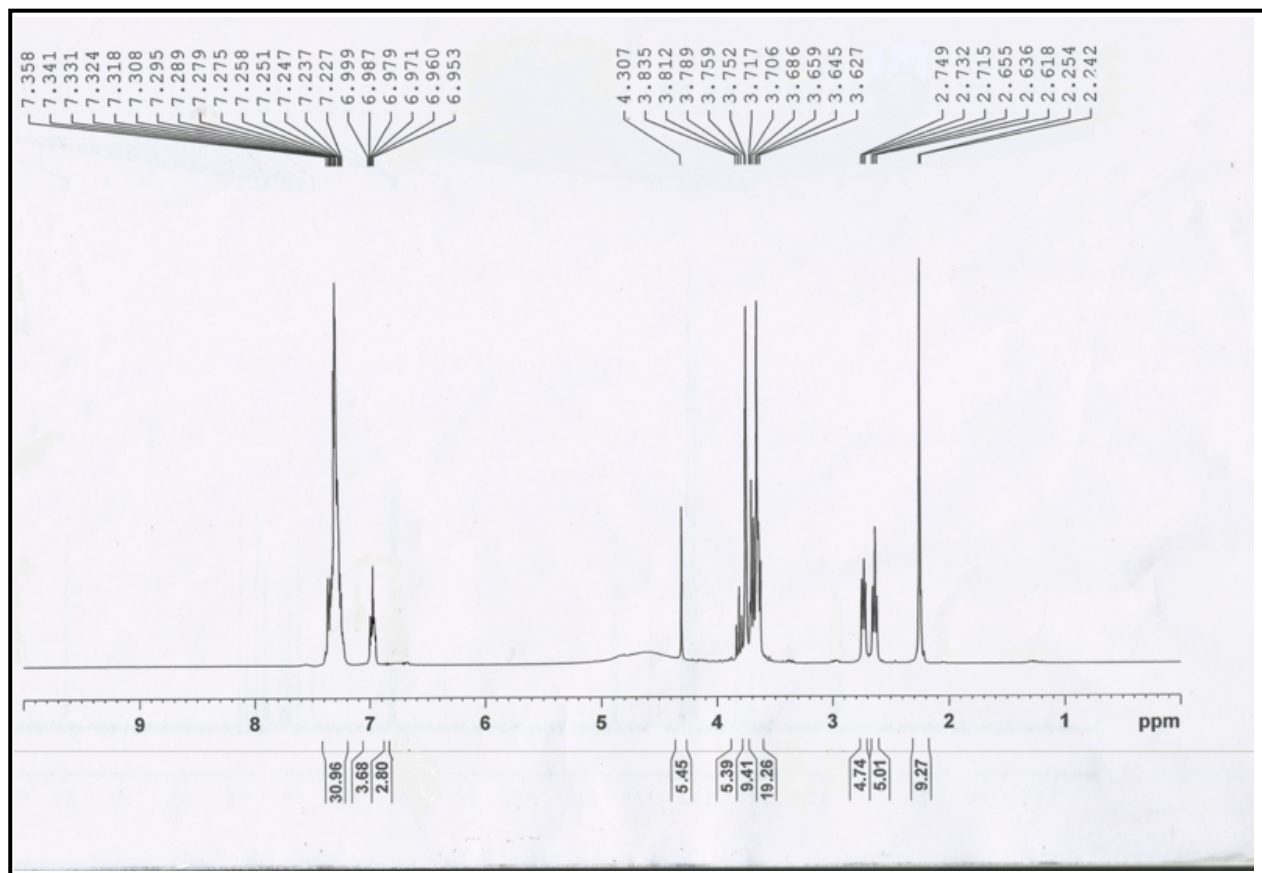

Figure S2. <sup>1</sup>H-NMR spectrum of ligand HL.

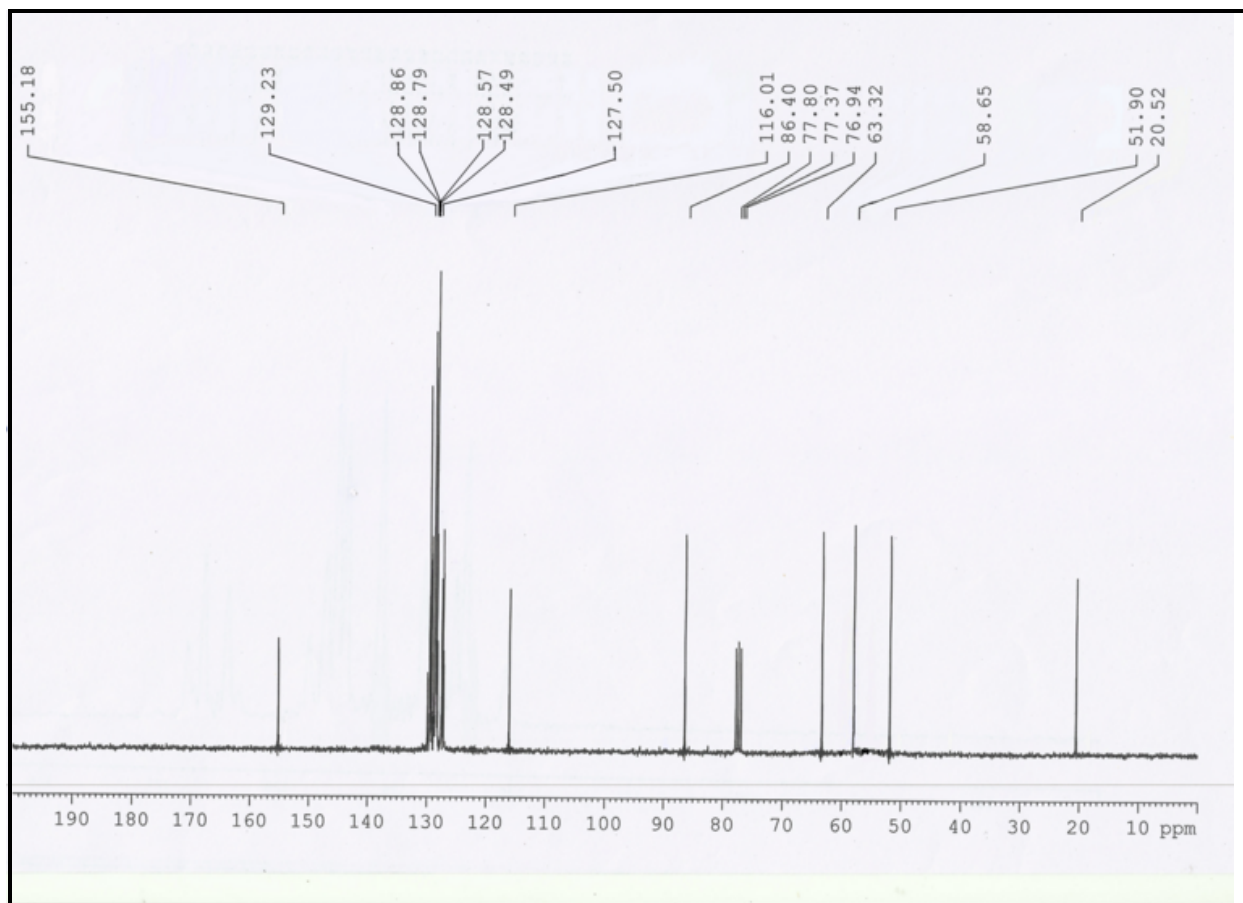

**Figure S3.**  $^{13}\text{C}$ -NMR spectrum of ligand HL.

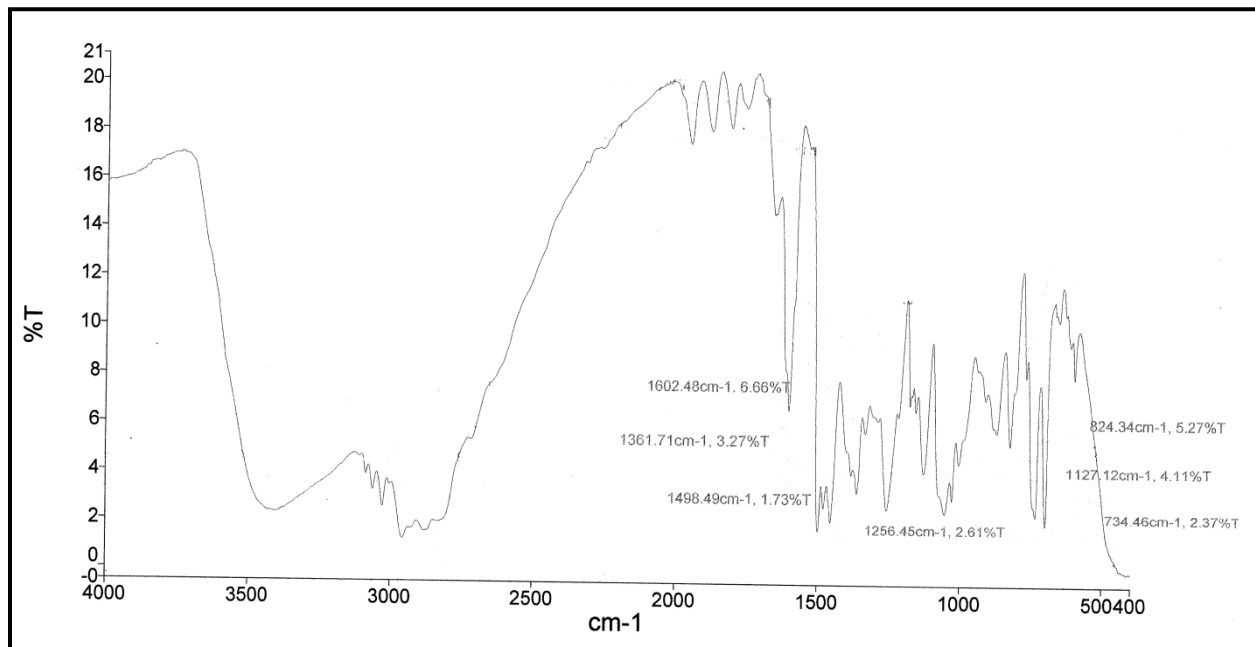

**Figure S4.** FTIR spectrum of ligand HL.

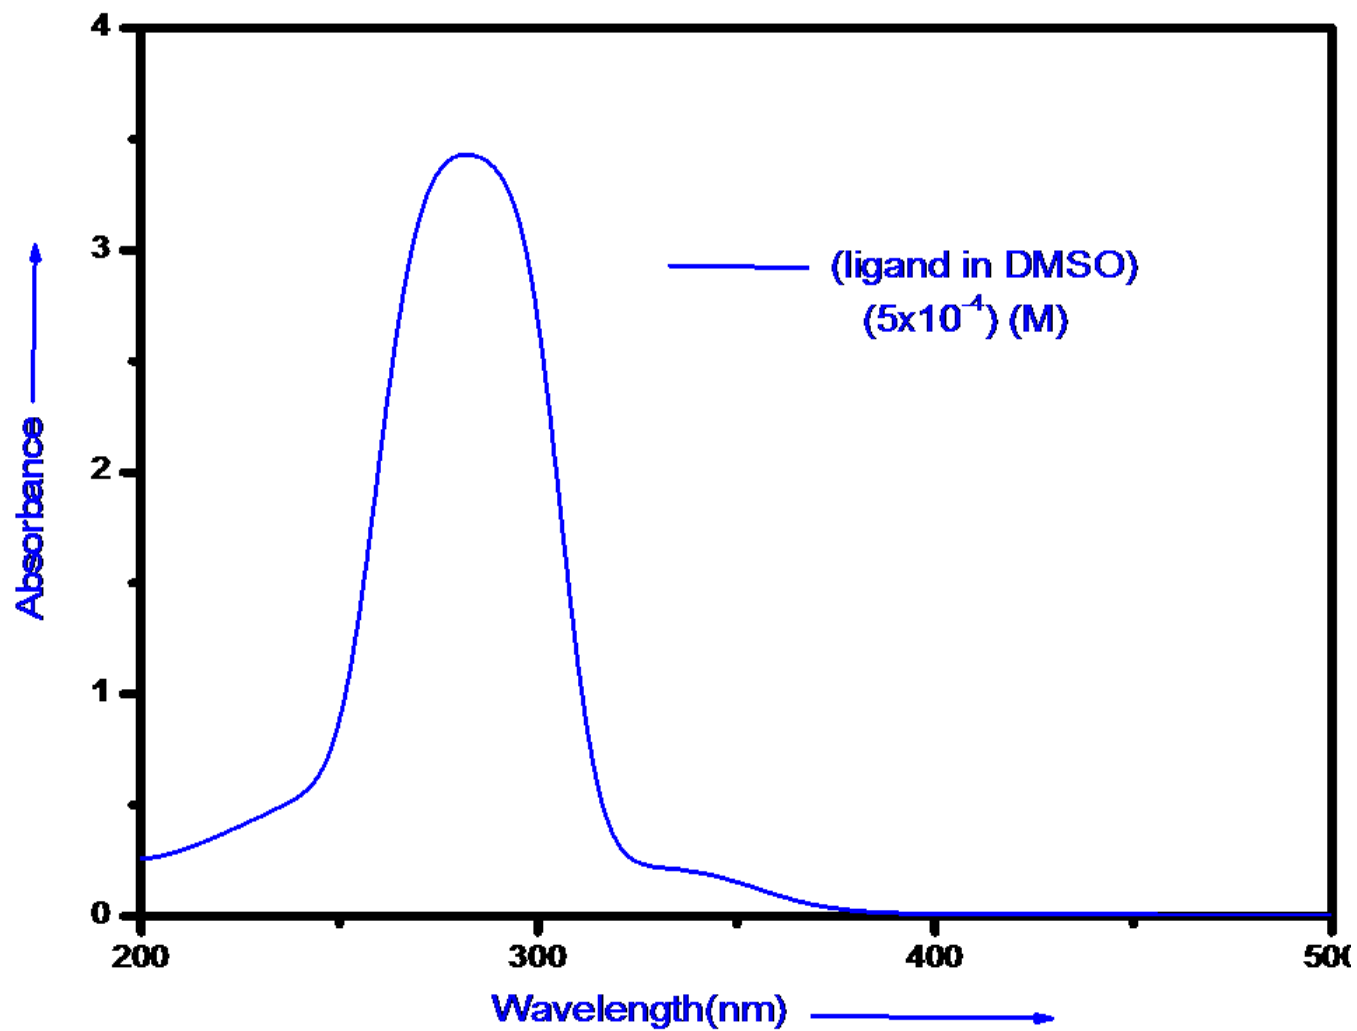

Figure S5. UV-VIS spectrum of ligand HL in DMSO.

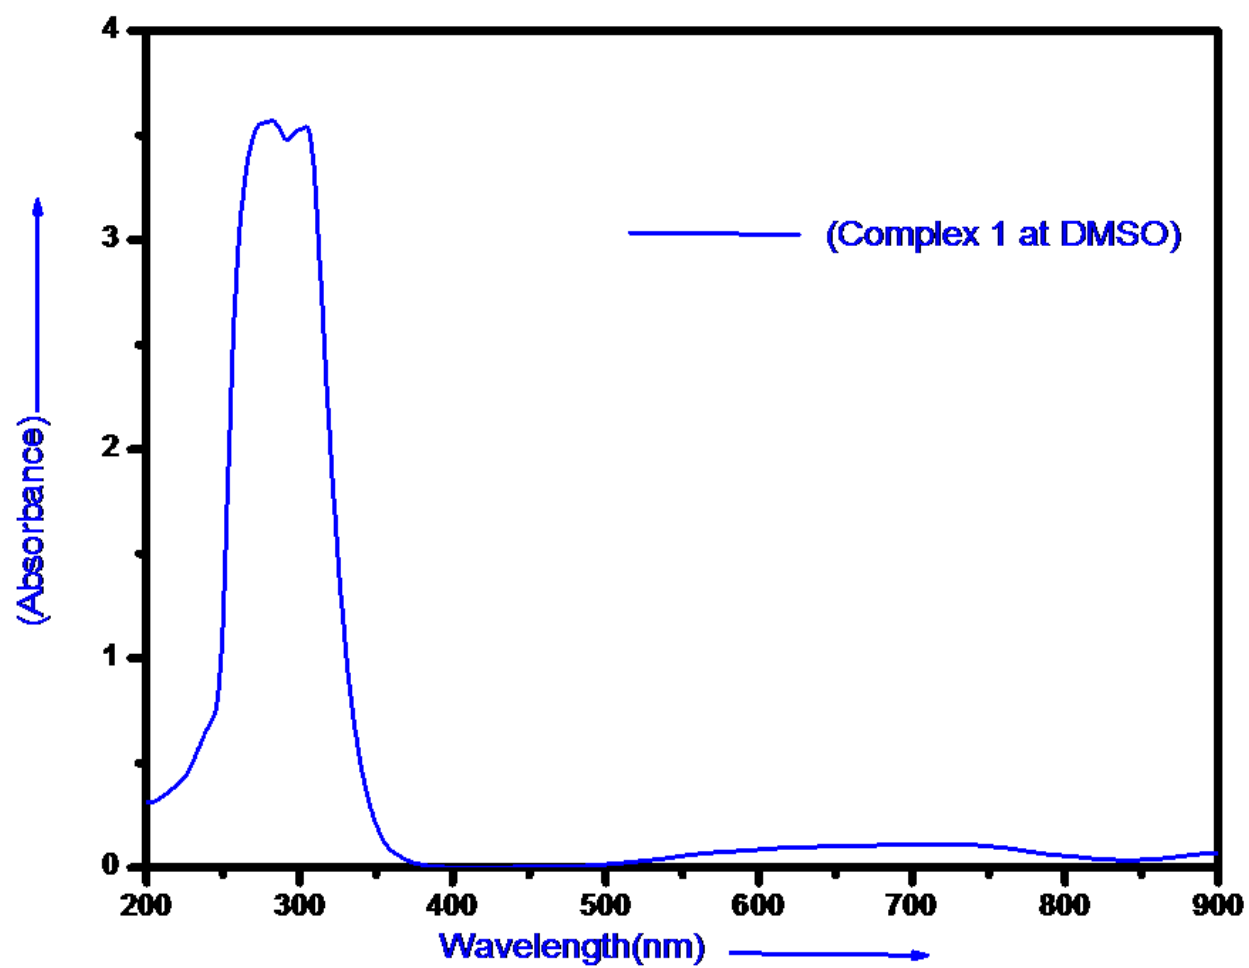

Figure S6. UV-VIS spectrum of Complex 1 in DMSO.

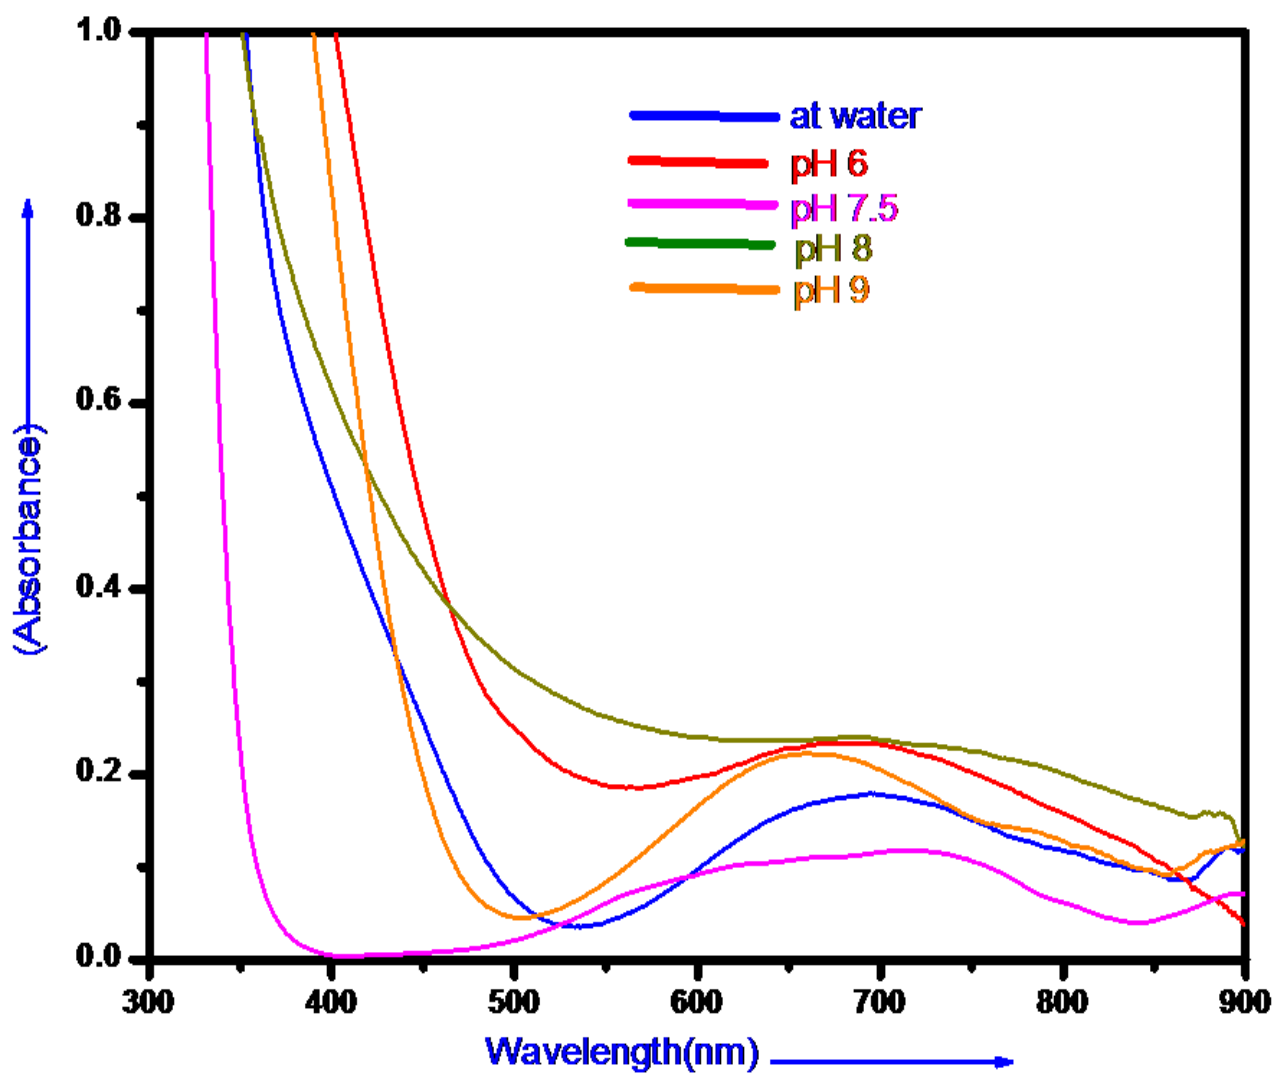

Figure S7. UV-VIS spectrum of Complex 1 in different pH at DMSO-buffer medium.

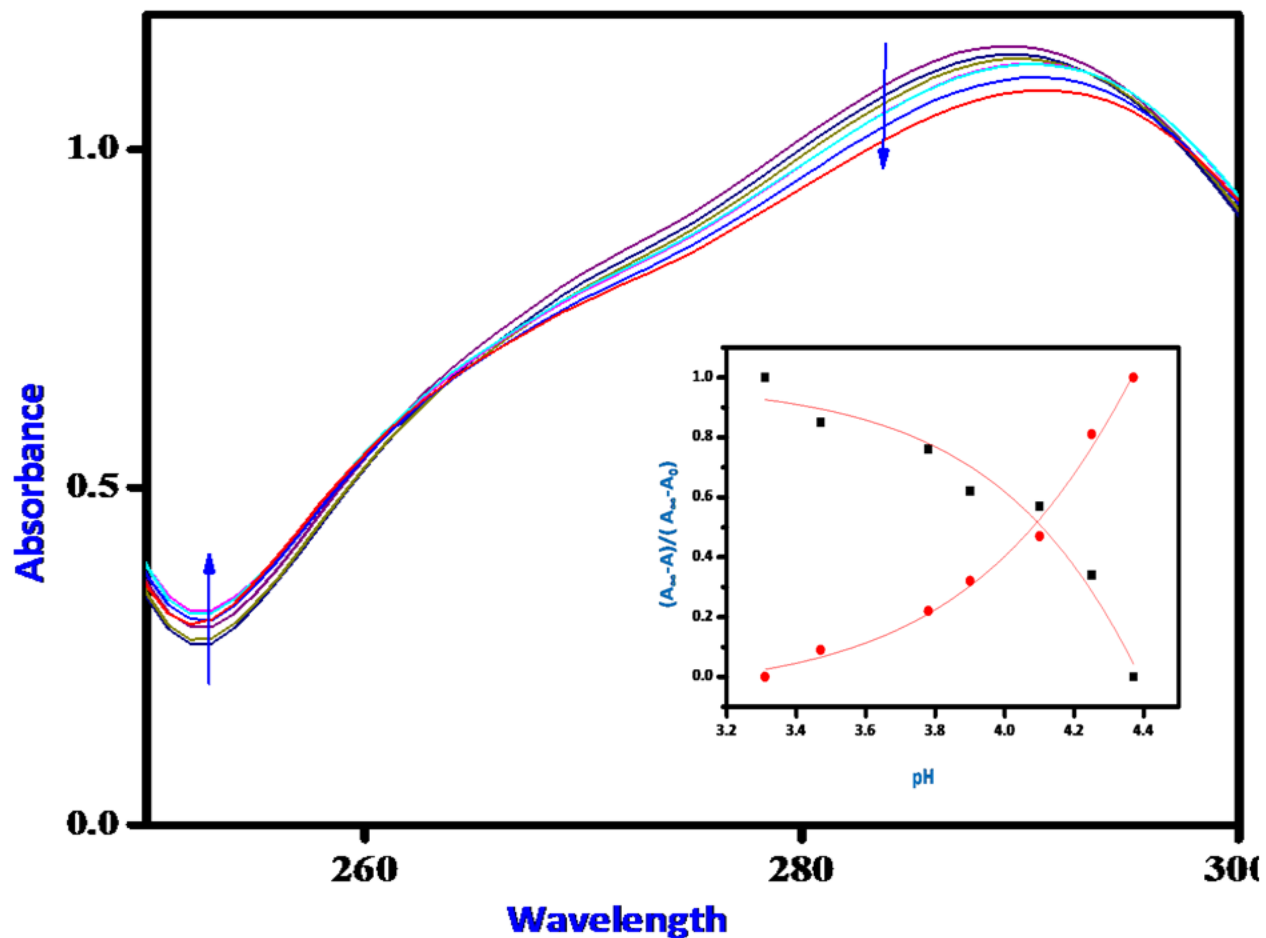

**Figure S8.** Spectrophotometric titration of **1** (pH value: 3.45-4.5; pKa = 4.10) Conditions: Complex =  $10^{-3}$  [M]; [KCl] = 0.100 mol.L<sup>-1</sup>; [KOH] = 0.100 mol.L<sup>-1</sup>; in solution DMSO /water (75:25%v/v – 50 mL) at 25°C.

**Table S1:** pKa values of complex **1**

| Complex  | pKa[HL]<br>pH range=3.45-4.5 | pKa[M-OH <sub>2</sub> (1)]<br>pH range=5.54-6.85 | pKa[M-OH <sub>2</sub> (2)]<br>pH range=7.15-9.23 |
|----------|------------------------------|--------------------------------------------------|--------------------------------------------------|
| <b>1</b> | 4.1                          | 6.1                                              | 8.15                                             |

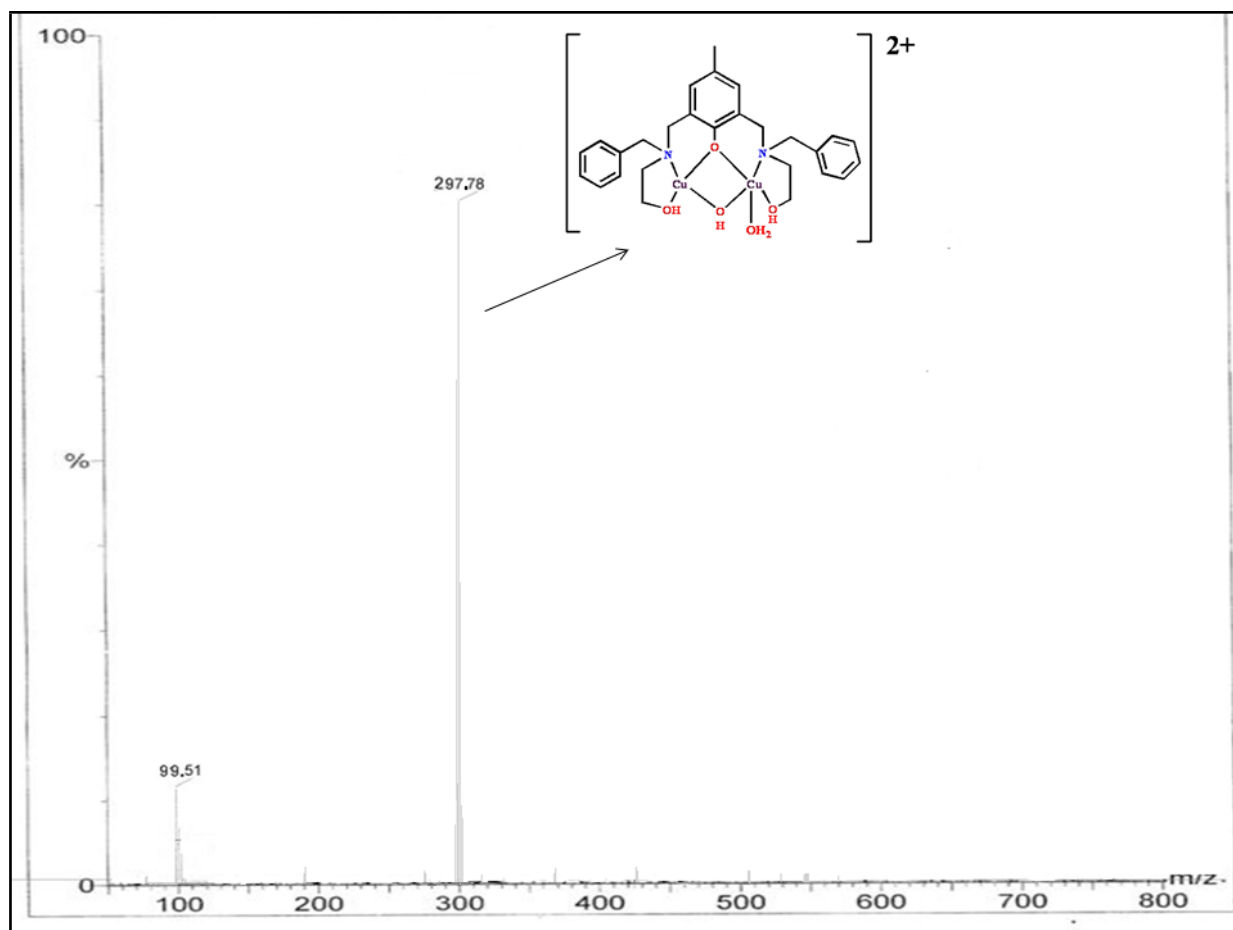

**Figure S9.** ESI-MS spectrum of Complex 1 in DMSO-water medium.



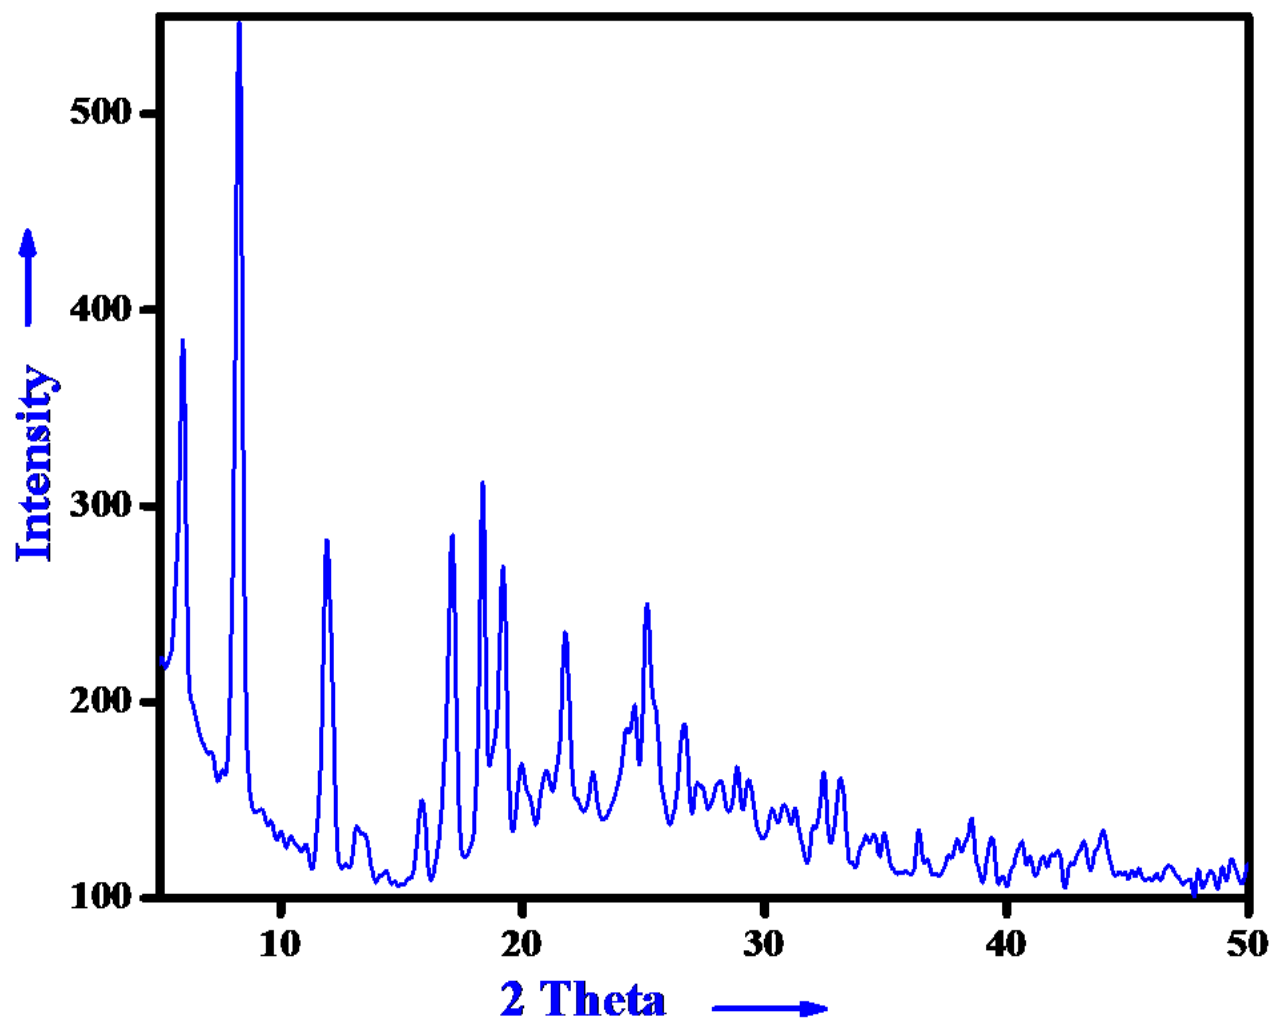

Figure S10. PXRD pattern of complex 1.

Table S2.  $k_{cat}$  Value for Dinuclear Complex 1 for oxidation of 3,5 DTBC in DMSO.

| Complex | Wavelength (nm) | $V_{max}$ ( $M s^{-1}$ ) | $K_M$ (M)            | $k_{cat}$ ( $h^{-1}$ ) |
|---------|-----------------|--------------------------|----------------------|------------------------|
| 1       | 396             | $2.11 \times 10^{-6}$    | $2.2 \times 10^{-3}$ | $0.762 \times 10^2$    |

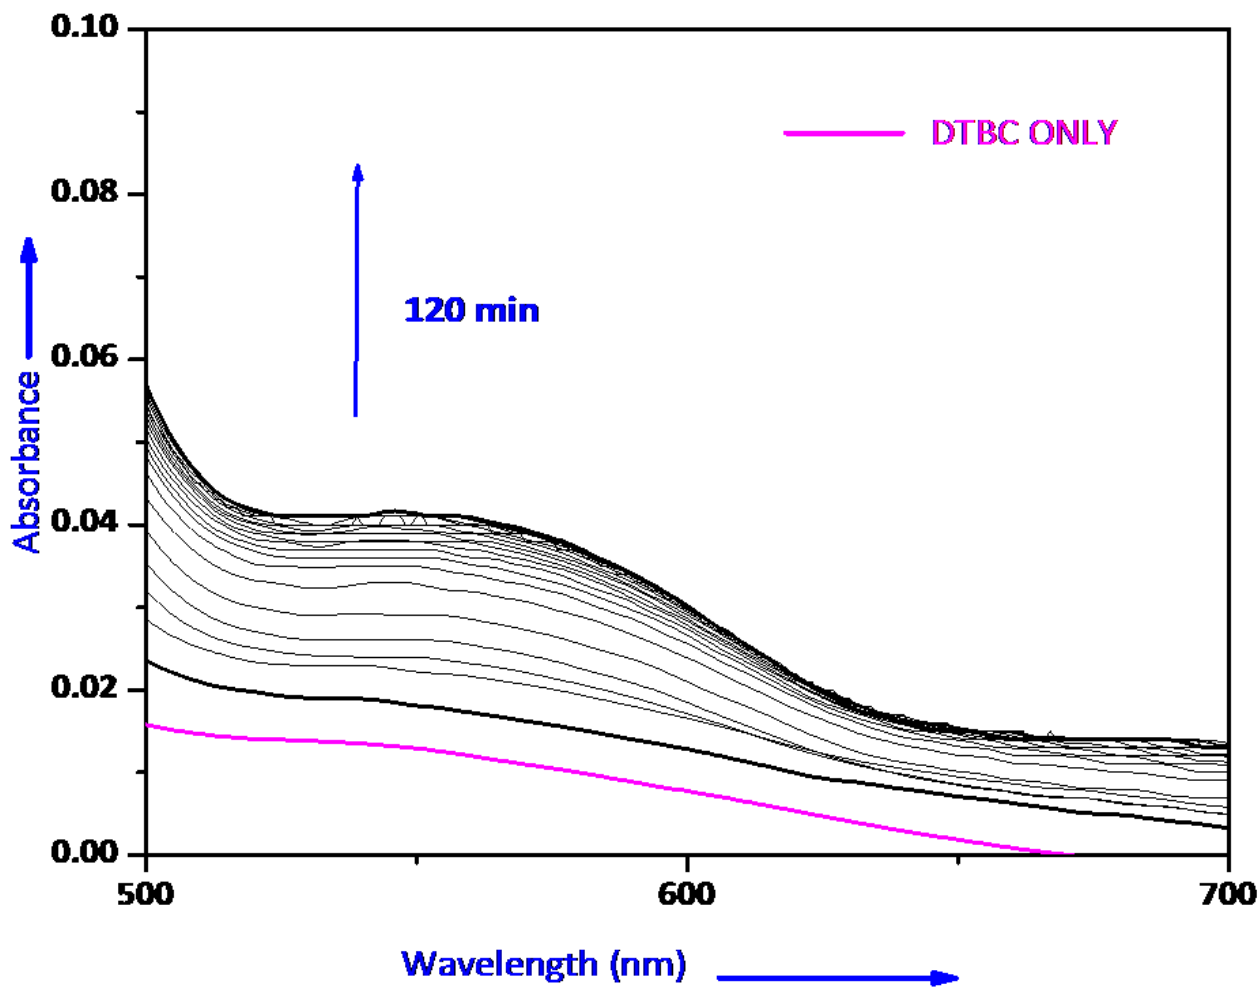

Figure S11. Change of d-d band of complex 1 during catecholase activity.

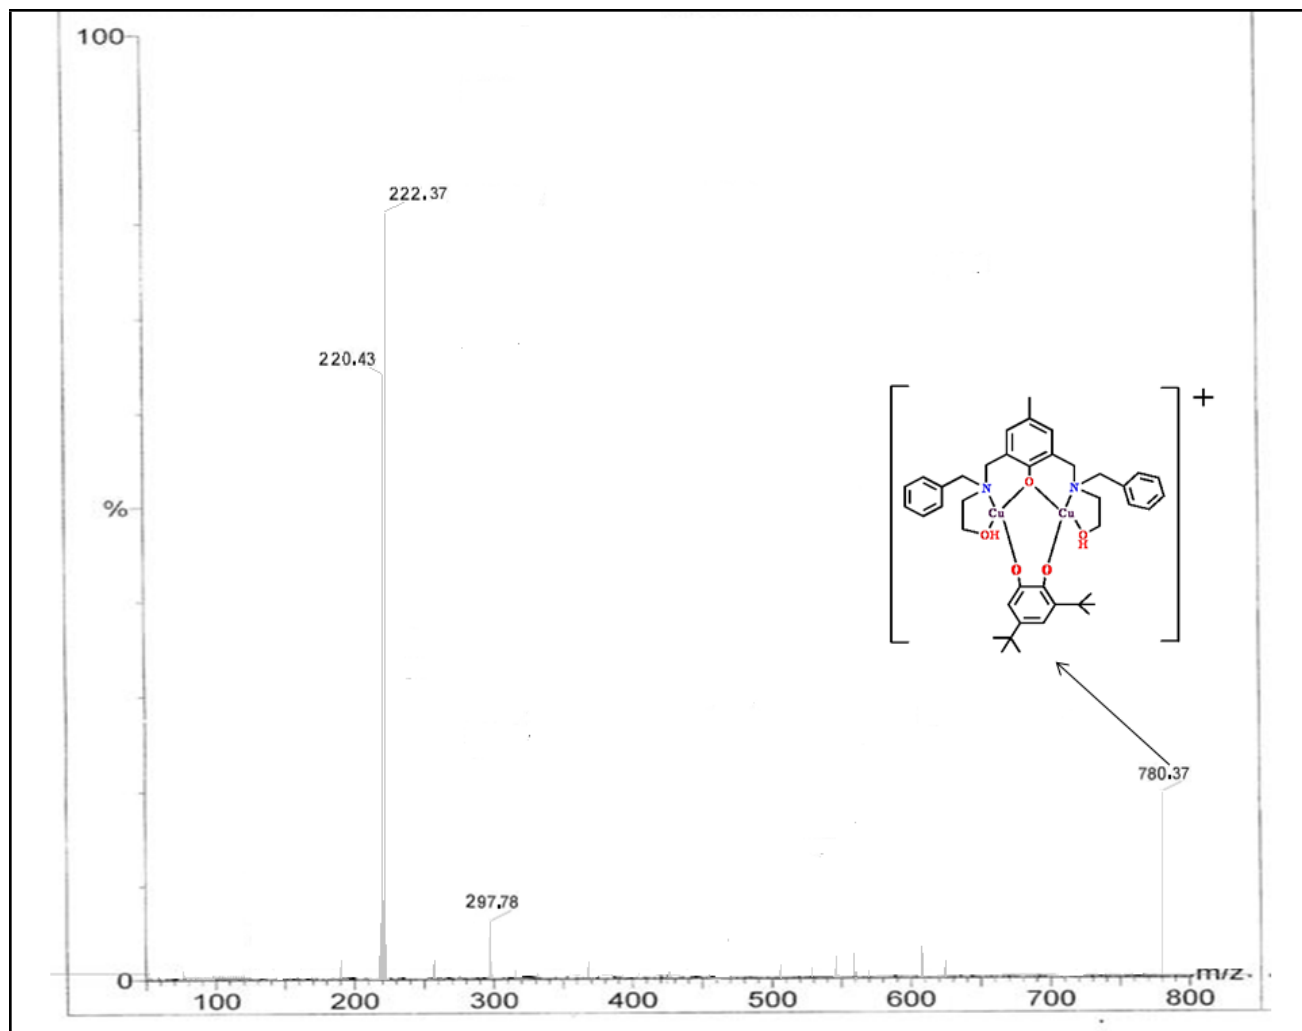

**Figure S12.** ESI-MS spectrum of complex –DTBC adduct after 1 hour of mixing.

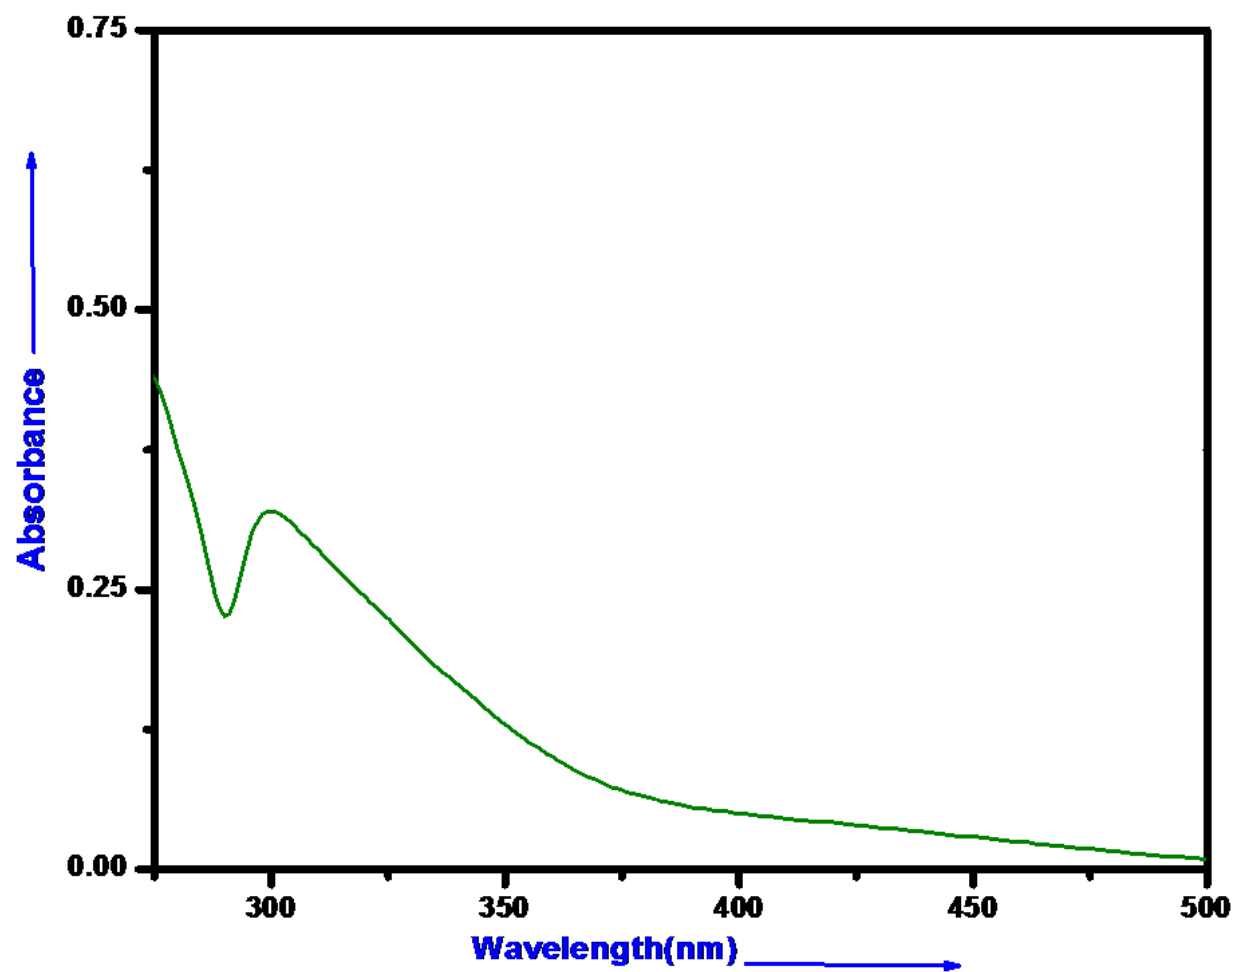

Figure S13. Spectral scan to detect  $I_3^-$ .

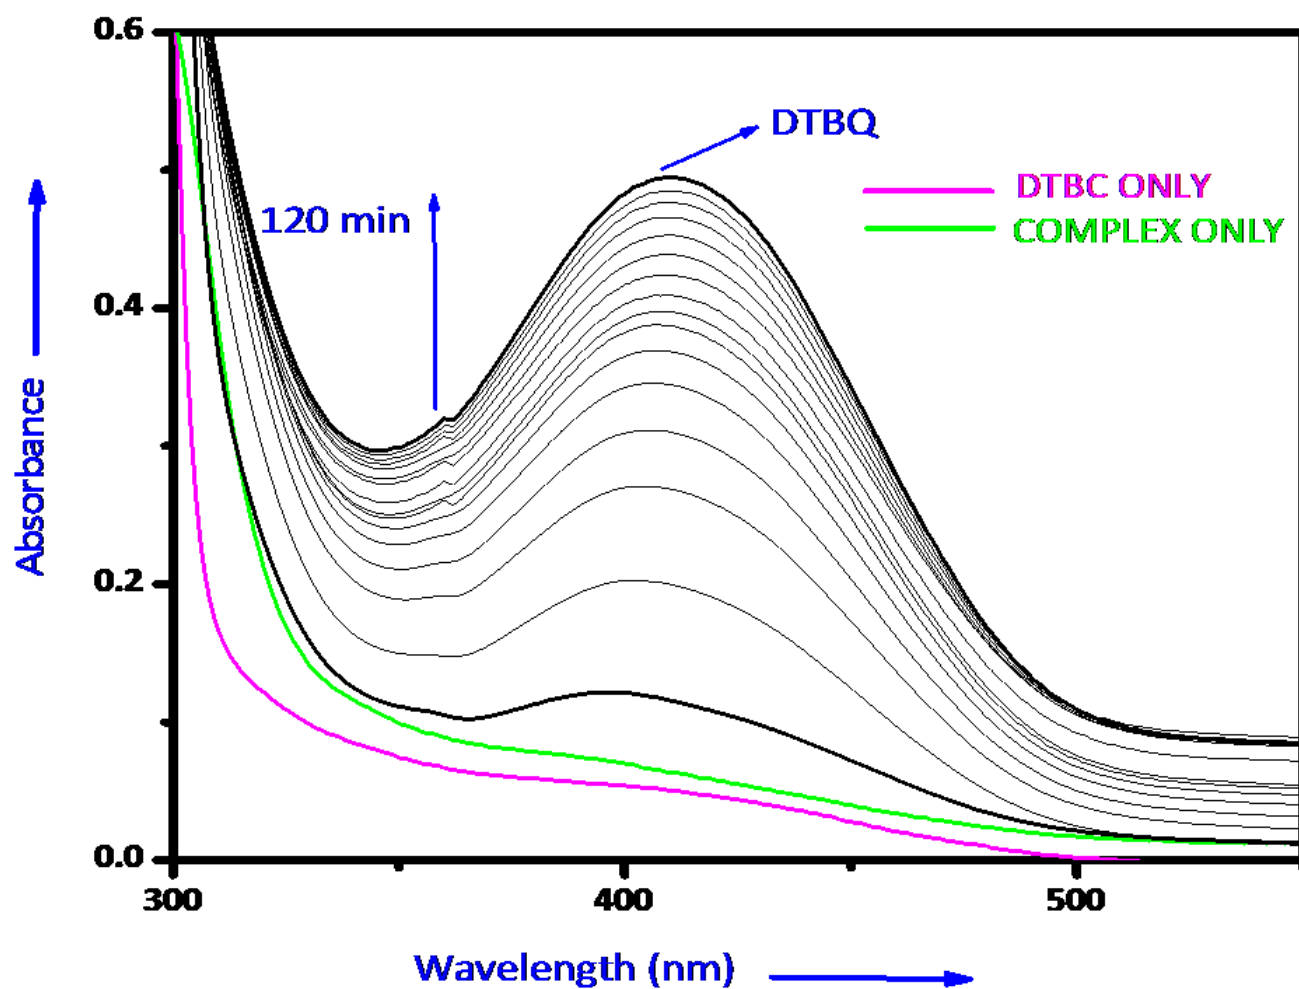

**Figure S14.** Changes observed in UV-vis spectra of complex 1 up to 120 minutes (conc.  $1 \times 10^{-4}$  M) upon addition of 100-fold 3, 5-DTBC ( $1 \times 10^{-2}$  M) in 50% DMSO-water mixture.

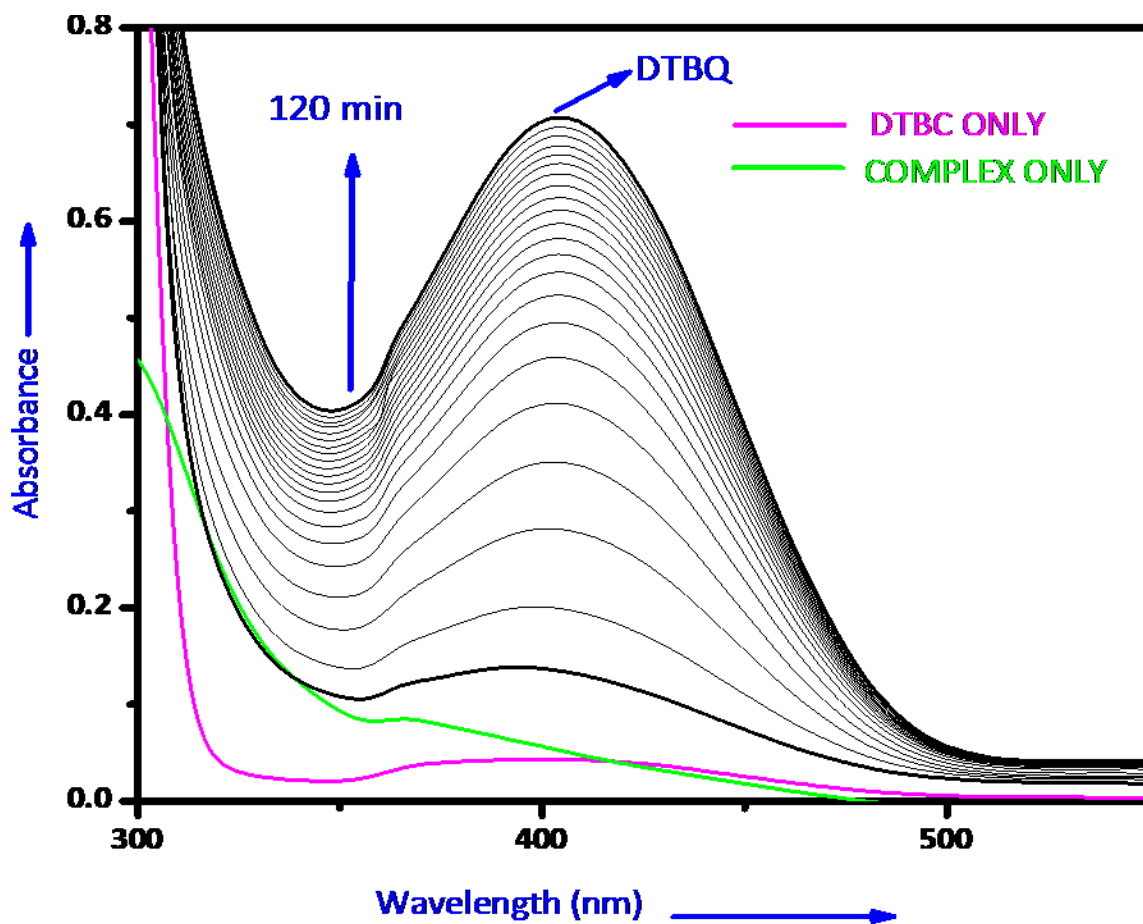

**Figure S15.** Changes observed in UV-vis spectra of complex **1** up to 120 minutes (conc.  $1 \times 10^{-4}$  M) upon addition of 100-fold 3, 5-DTBC ( $1 \times 10^{-2}$  M) in 75% DMSO-water mixture.

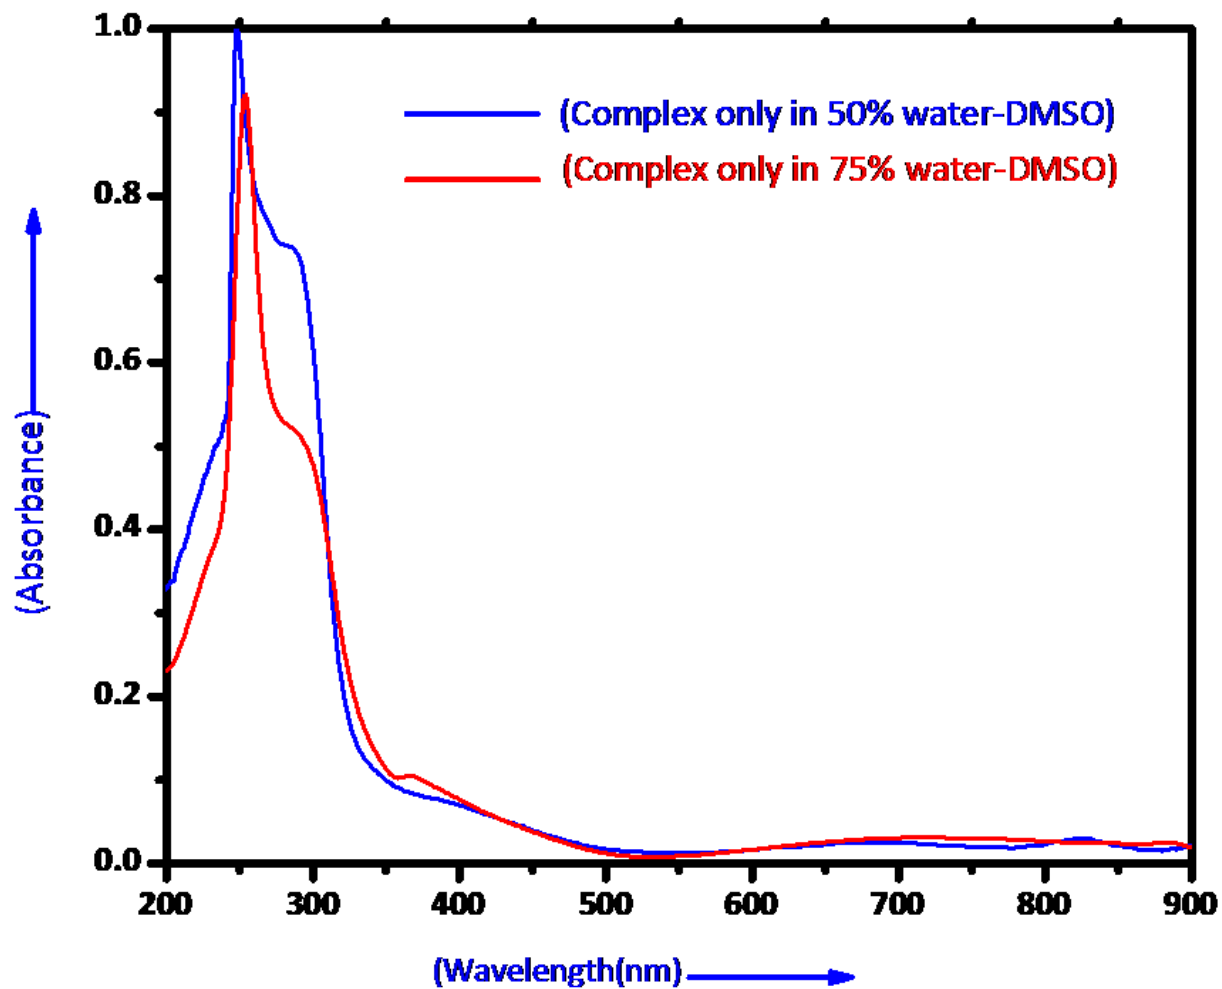

Figure S16. Spectra of complex 1 in different percentage of water-DMSO medium.

Table S3. Kinetics Parameters for the Phosphatase Activity of Complex 1

| Complex | Wavelength (nm) | $V_{\max}$ (M s <sup>-1</sup> ) | $K_M$ (M)             | $k_{\text{cat}}$ (s <sup>-1</sup> ) |
|---------|-----------------|---------------------------------|-----------------------|-------------------------------------|
| 1       | 425             | $8.4904 \times 10^{-5}$         | $1.06 \times 10^{-3}$ | 1.69                                |

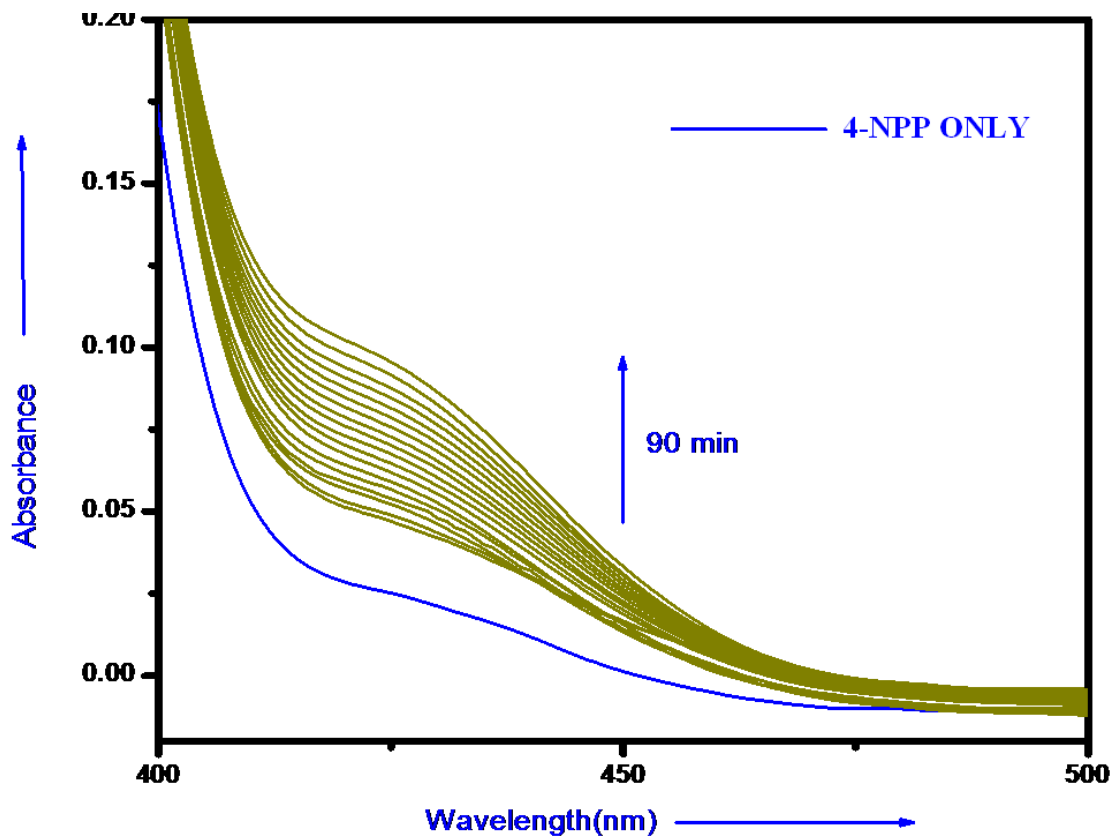

**Figure S17.** Wavelength scan for the hydrolysis of 4-NPP in the absence and presence of complex **1** (substrate:catalyst = 20:1) in 75% DMSO-buffer medium at pH7.0 recorded at 25°C at an interval of 5 minutes for 90 min. [4-NPP]= $1 \times 10^{-3}$ (M), [Complex]= $0.05 \times 10^{-3}$ (M). Arrow shows the change in absorbance with reaction time.



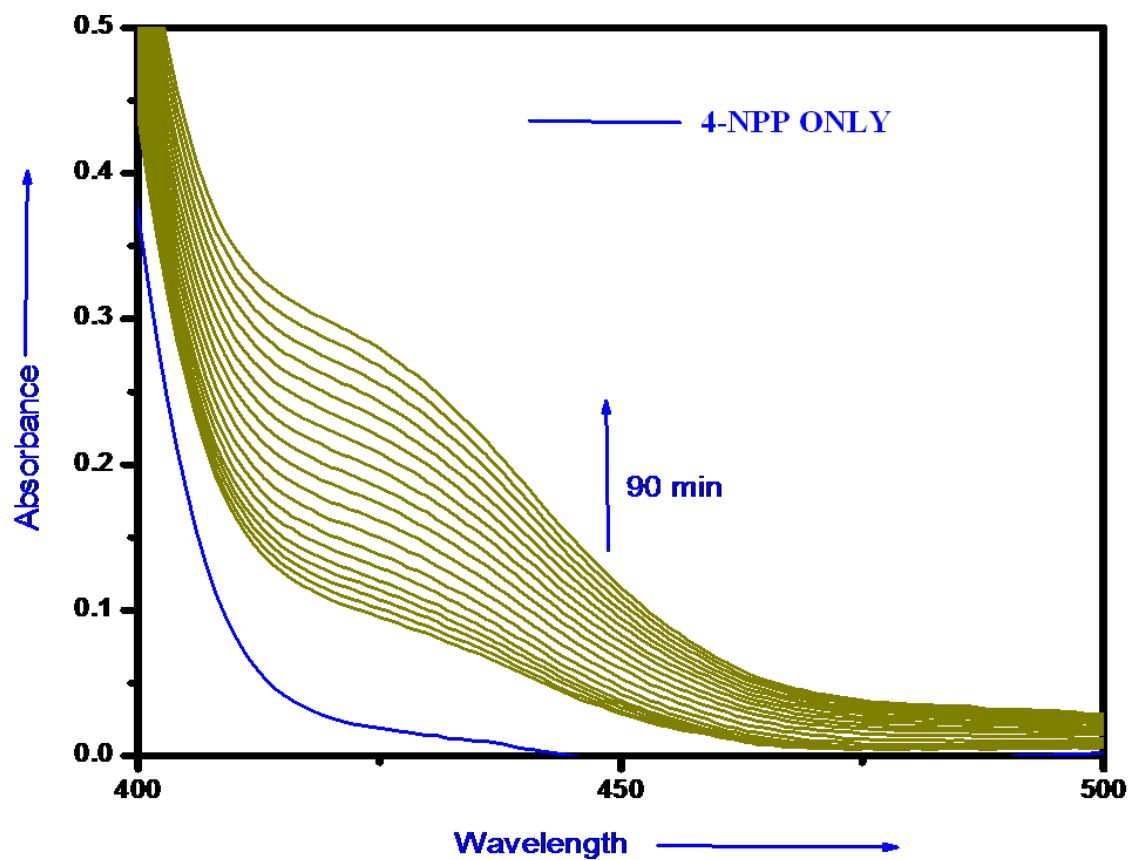

**Figure S18.** Wavelength scan for the hydrolysis of 4-NPP in the absence and presence of complex **1** (substrate : catalyst = 20:1) in 75% DMSO-buffer medium at pH 7.5 recorded at 25°C at an interval of 5 minutes for 90 min. [4-NPP]= $1 \times 10^{-3}$ (M), [Complex]= $0.05 \times 10^{-3}$ (M). Arrow shows the change in absorbance with reaction time.

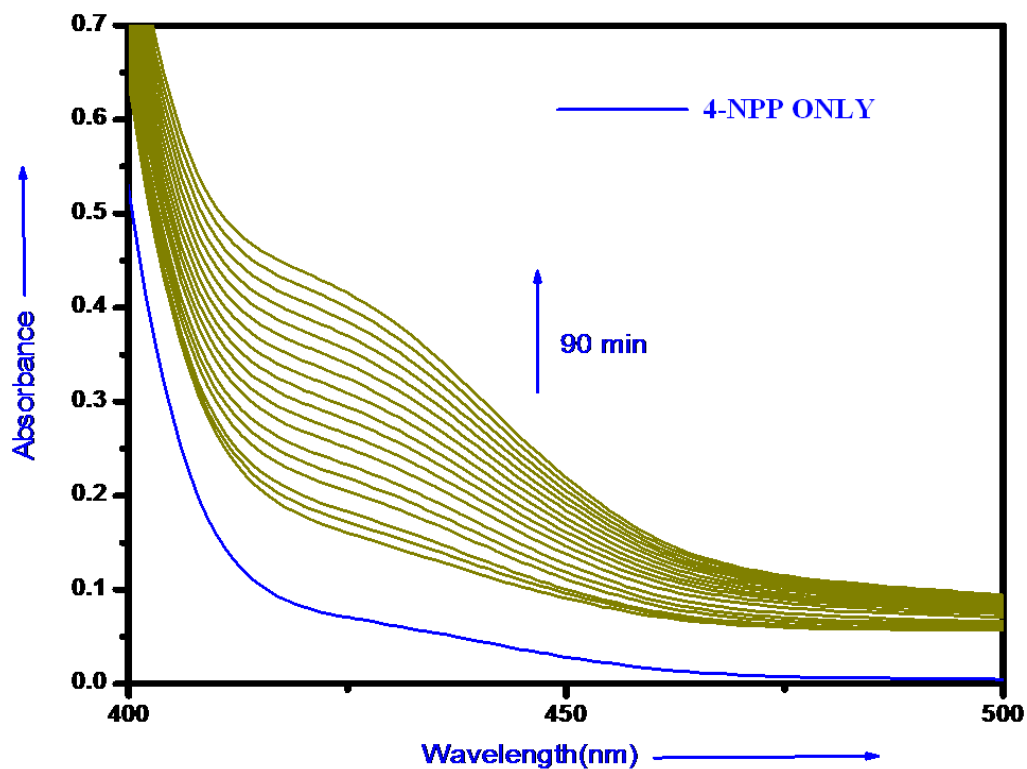

**Figure S19.** Wavelength scan for the hydrolysis of 4-NPP in the absence and presence of complex **1** (substrate: catalyst = 20:1) in 75% DMSO-buffer medium at pH **8.0** recorded at 25°C at an interval of 5 minutes for 90 min.  $[4\text{-NPP}] = 1 \times 10^{-3}(\text{M})$ ,  $[\text{Complex}] = 0.05 \times 10^{-3}(\text{M})$ . Arrow shows the change in absorbance with reaction time.

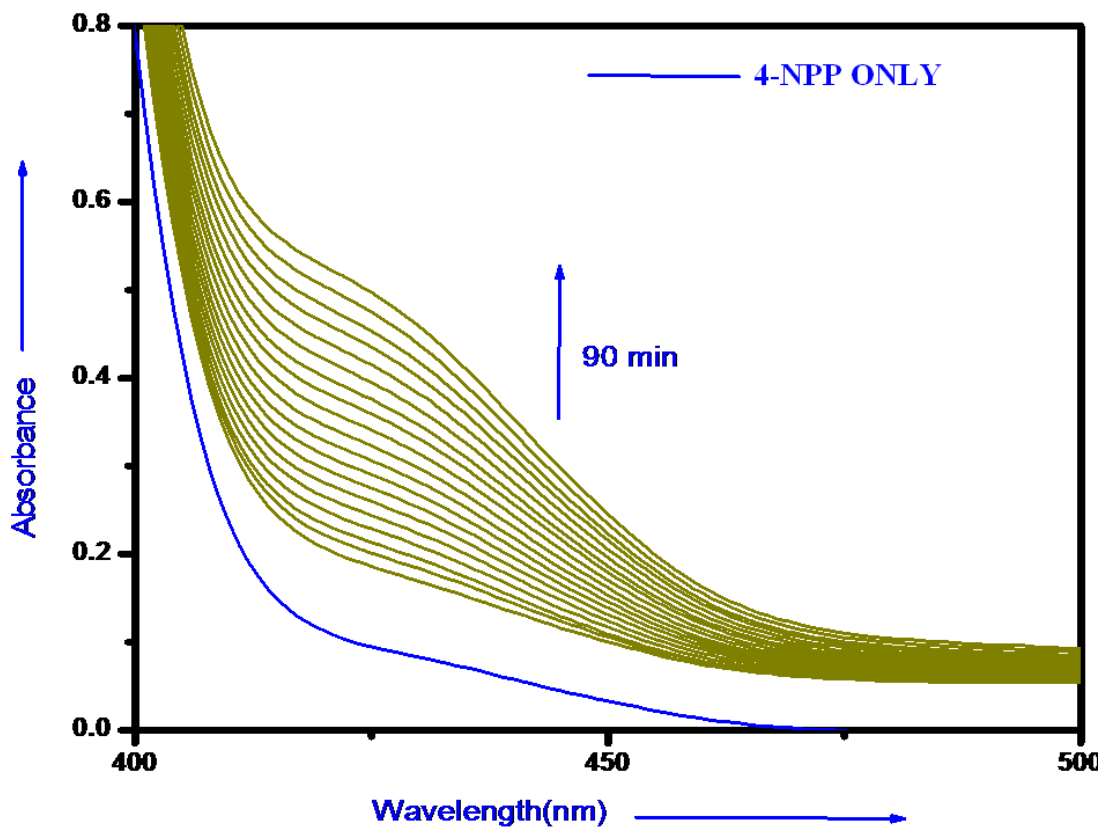

**Figure S20.** Wavelength scan for the hydrolysis of 4-NPP in the absence and presence of complex **1**( substrate: catalyst = 20:1) in 75% DMSO-buffer medium at pH **8.5** recorded at 25°C at an interval of 5 minutes for 90 min. [4-NPP]= $1 \times 10^{-3}$  (M), [Complex] = $0.05 \times 10^{-3}$  (M). Arrow shows the change in absorbance with reaction time.

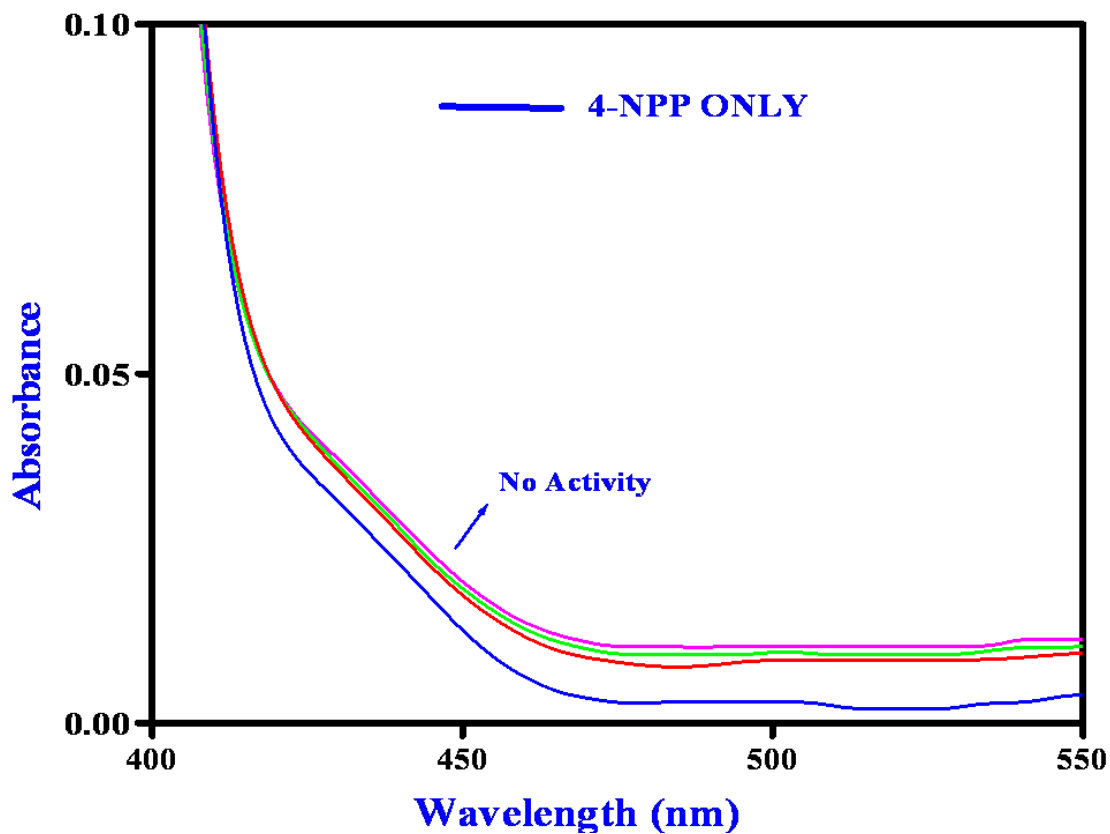

**Figure S21.** Wavelength scan for the hydrolysis of 4-NPP in the absence of complex 1 (substrate: catalyst = 20:1) in 75% DMSO-buffer medium at pH 9 recorded at 25°C at an interval of 10 minutes for 30 min. [4-NPP]= $1 \times 10^{-3}$  (M), [Complex] =  $0.05 \times 10^{-3}$  (M). Arrow shows the change in absorbance with reaction time.

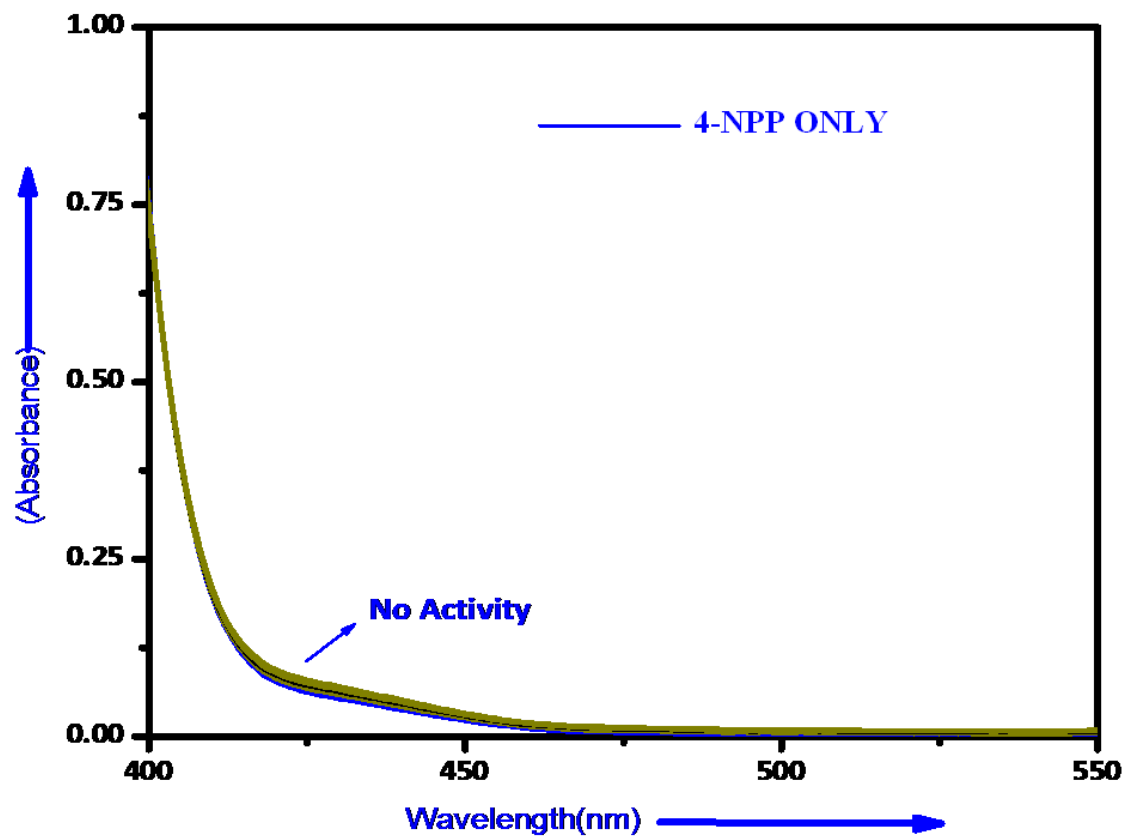

**Figure S22.** Wavelength scan for the hydrolysis of 4-NPP in the presence of Ligand HL(substrate:catalyst = 20:1) in 75% DMSO-buffer medium at pH 9 recorded at 25°C at an interval of 5 minutes for 30 mins. [4-NPP]= $1 \times 10^{-3}$ (M), [Ligand] = $0.05 \times 10^{-3}$ (M). Arrow shows negligible or no change in absorbance with reaction time.

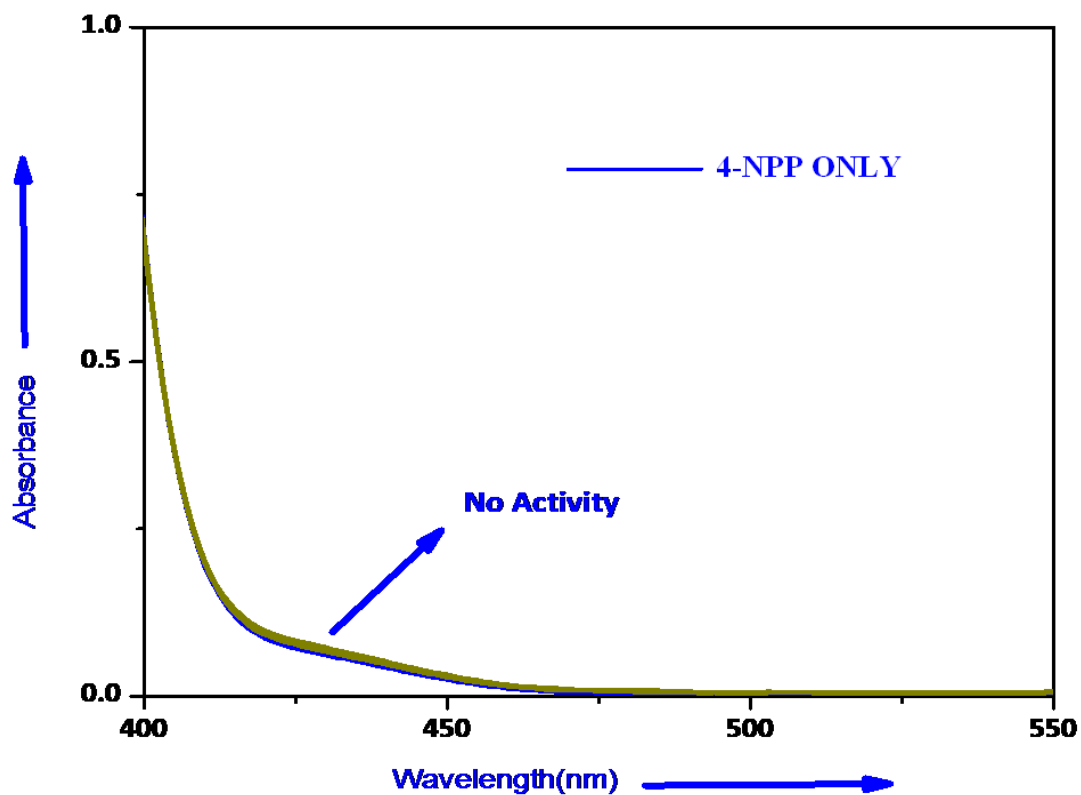

**Figure S23.** Wavelength scan for the hydrolysis of 4-NPP in the presence of  $\text{Cu}(\text{ClO}_4)_2$  (substrate:catalyst = 20:1) in 75% DMSO-buffer medium at pH 9 recorded at 25°C at an interval of 5 minutes for 30 mins.  $[\text{4-NPP}] = 1 \times 10^{-3}(\text{M})$ ,  $[\text{Ligand}] = 0.05 \times 10^{-3}(\text{M})$ . Arrow shows negligible or no change in absorbance with reaction time.

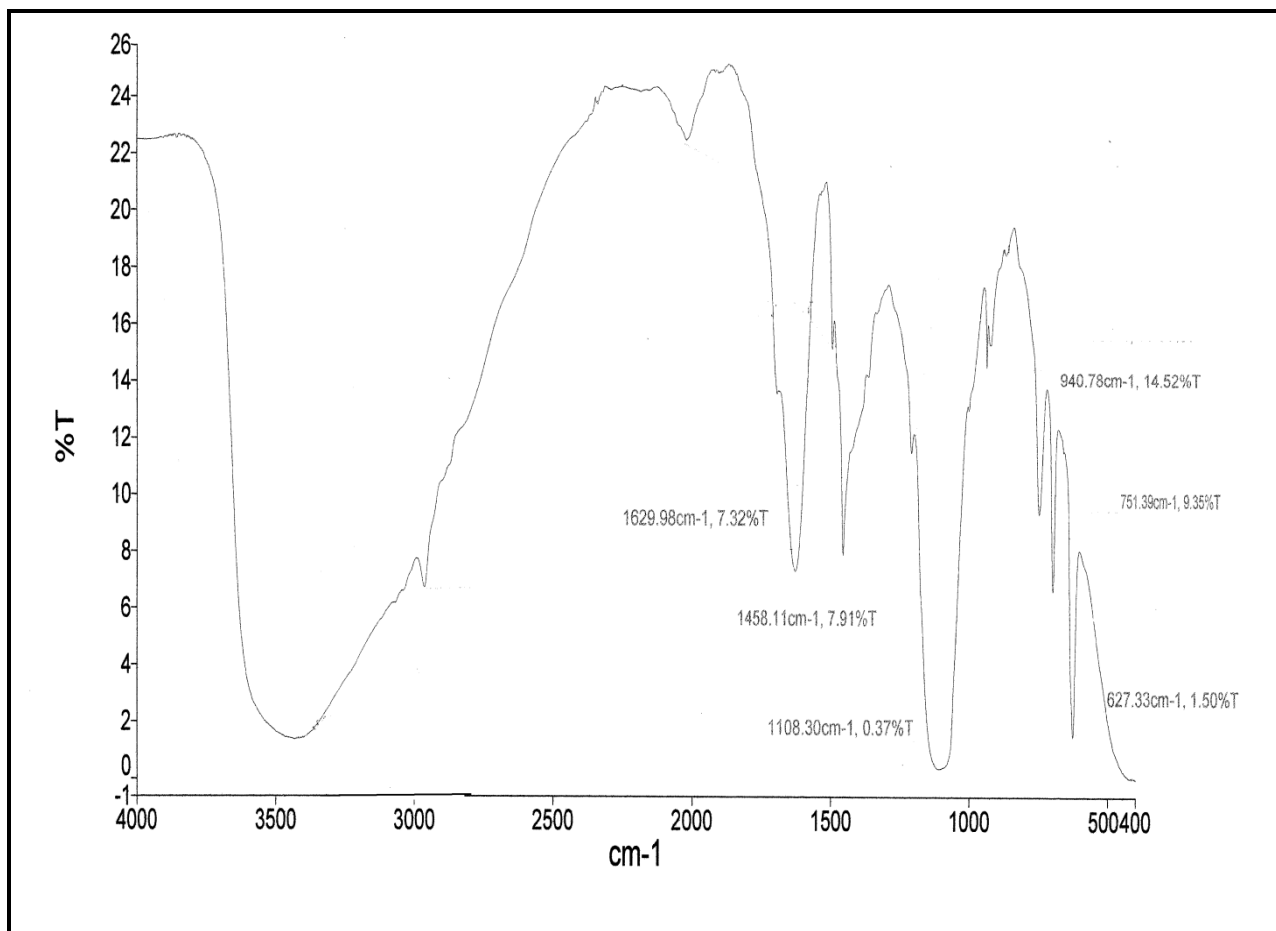

**Figure S24.** FTIR spectrum of Transformed ligand TL

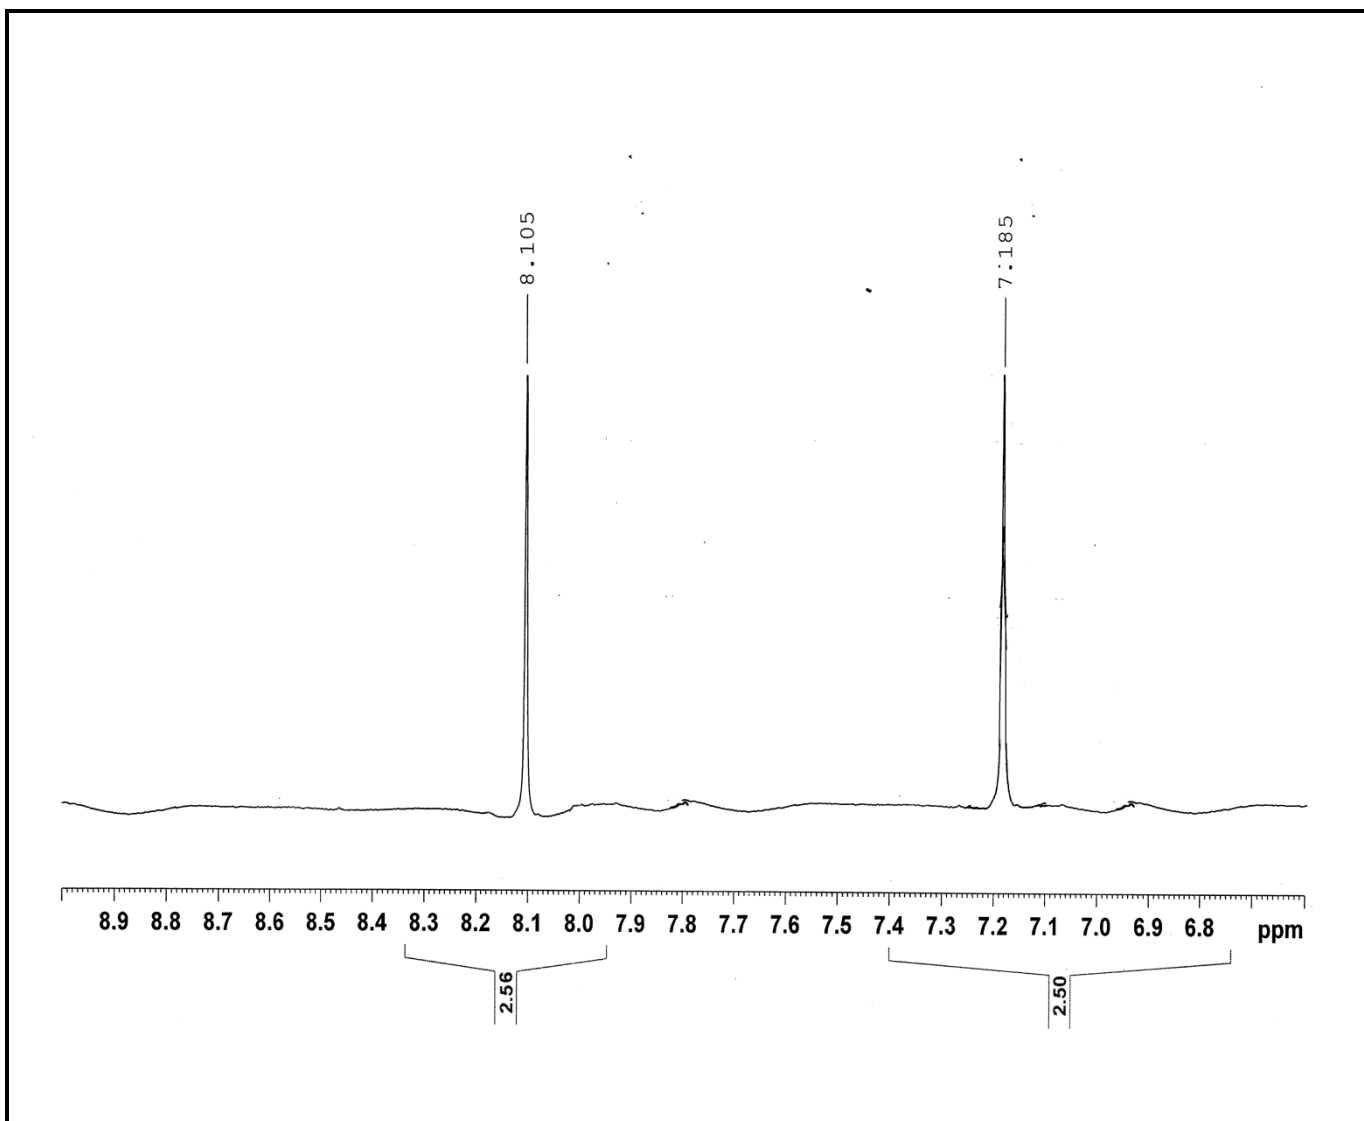

**Figure S25.** <sup>1</sup>H NMR spectrum of Transformed ligand TL



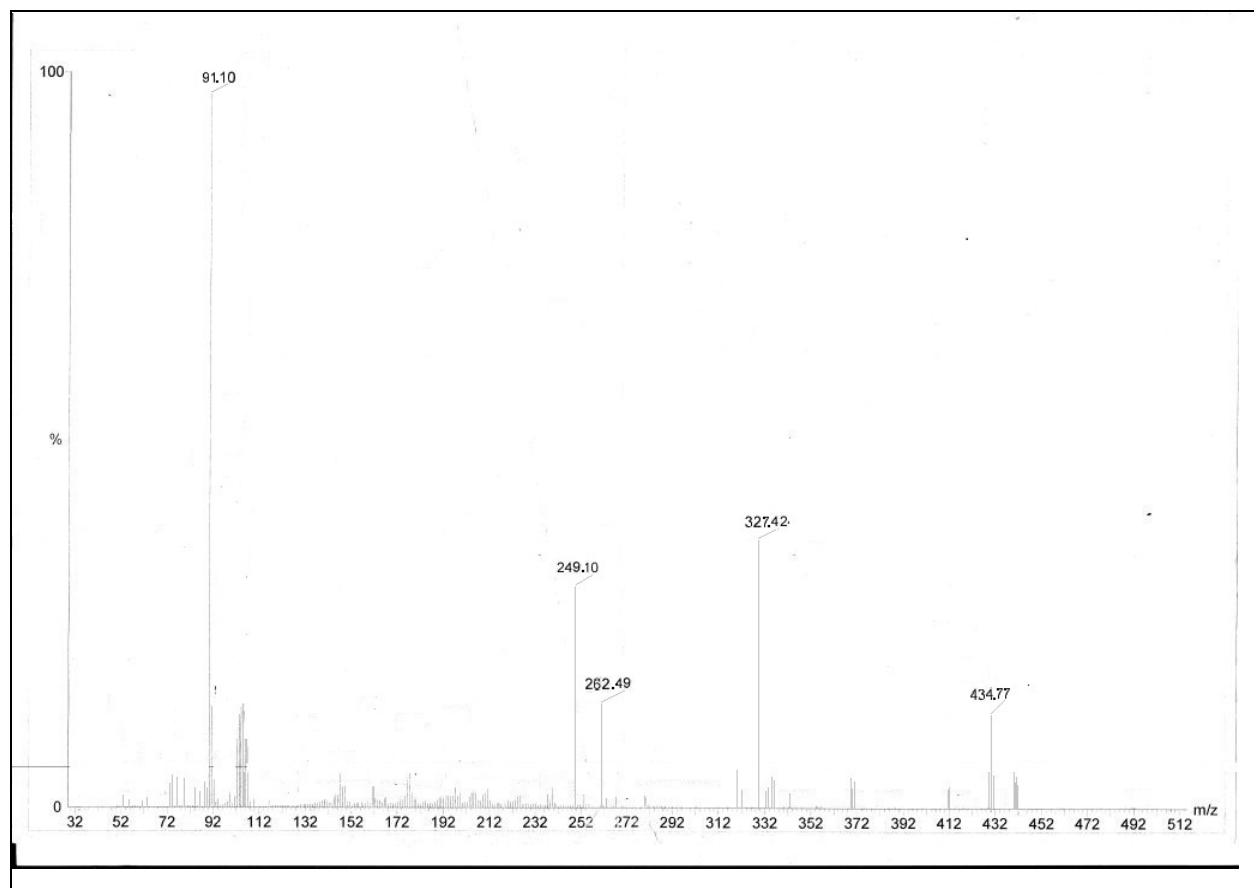

**Figure S26.** ESI-MS spectrum of reaction mixture in acetonitrile after 30 minutes of the addition of the ligand and  $\text{Cu}(\text{ClO}_4)_2$ .

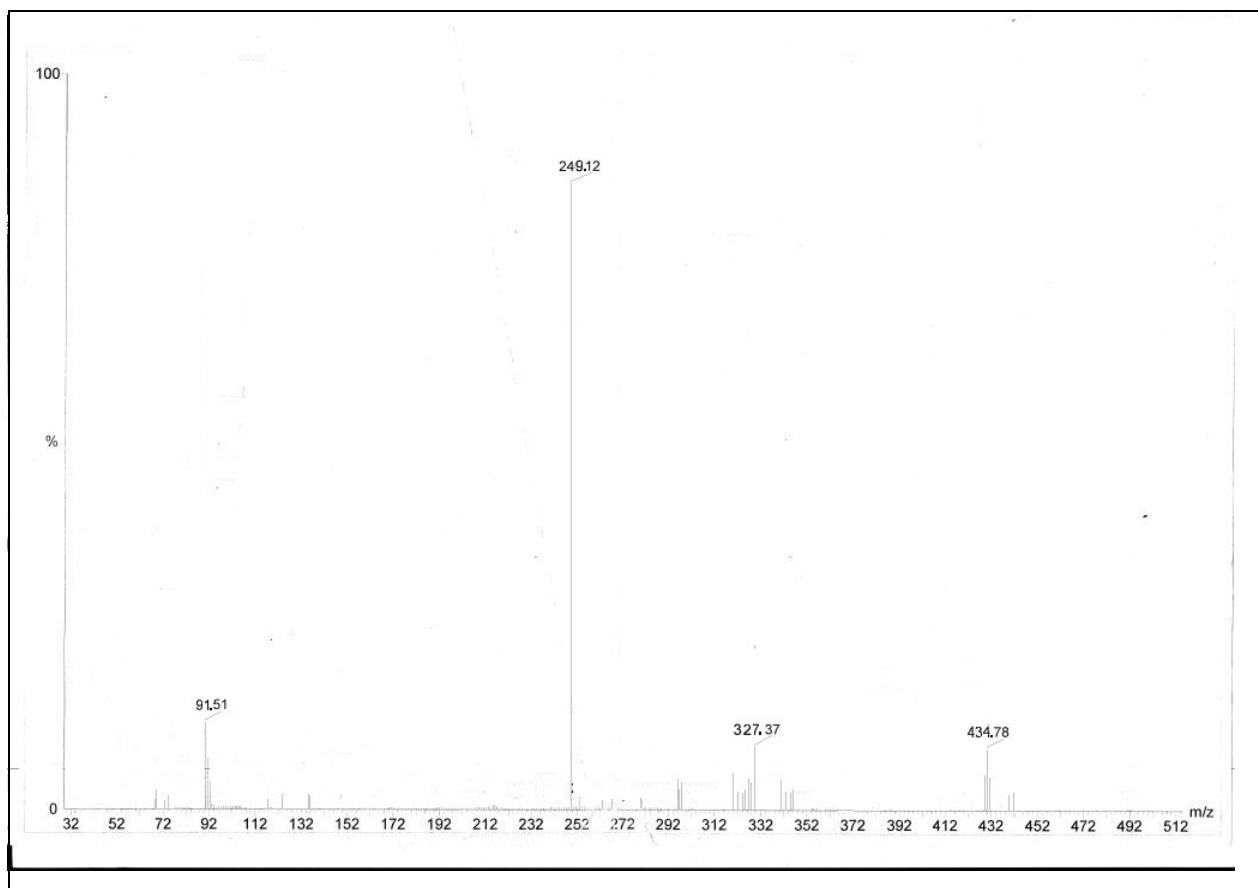

**Figure S27.** ESI-MS spectrum of deformed ligand TL after purification.

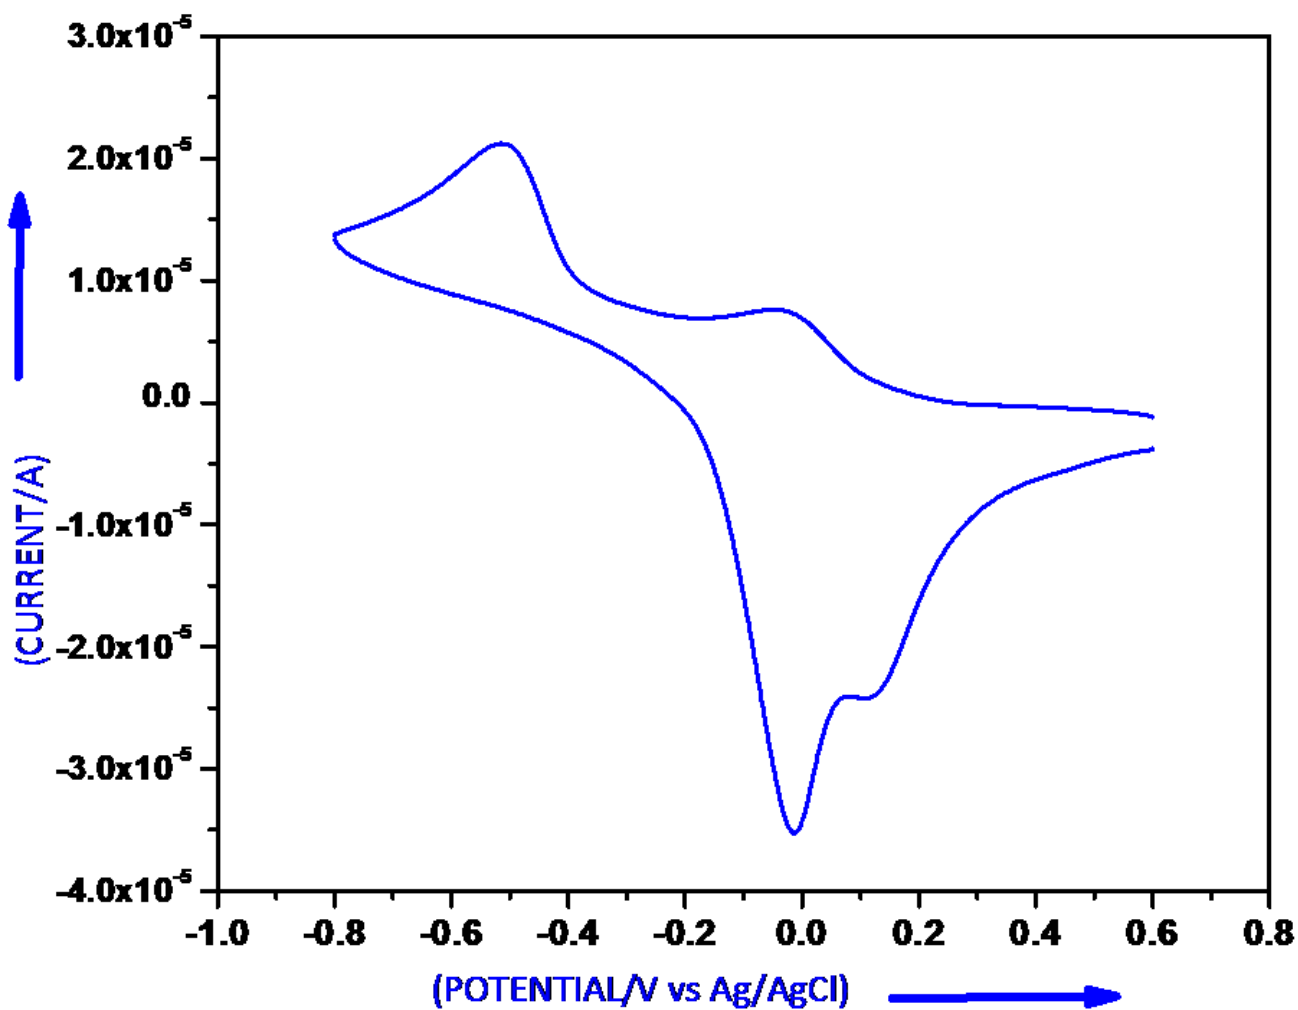

**Figure S28.** Cyclic voltammogram of complex **1** at the GC electrode in **DMSO** medium at  $100 \text{ mV s}^{-1}$  scan rate.

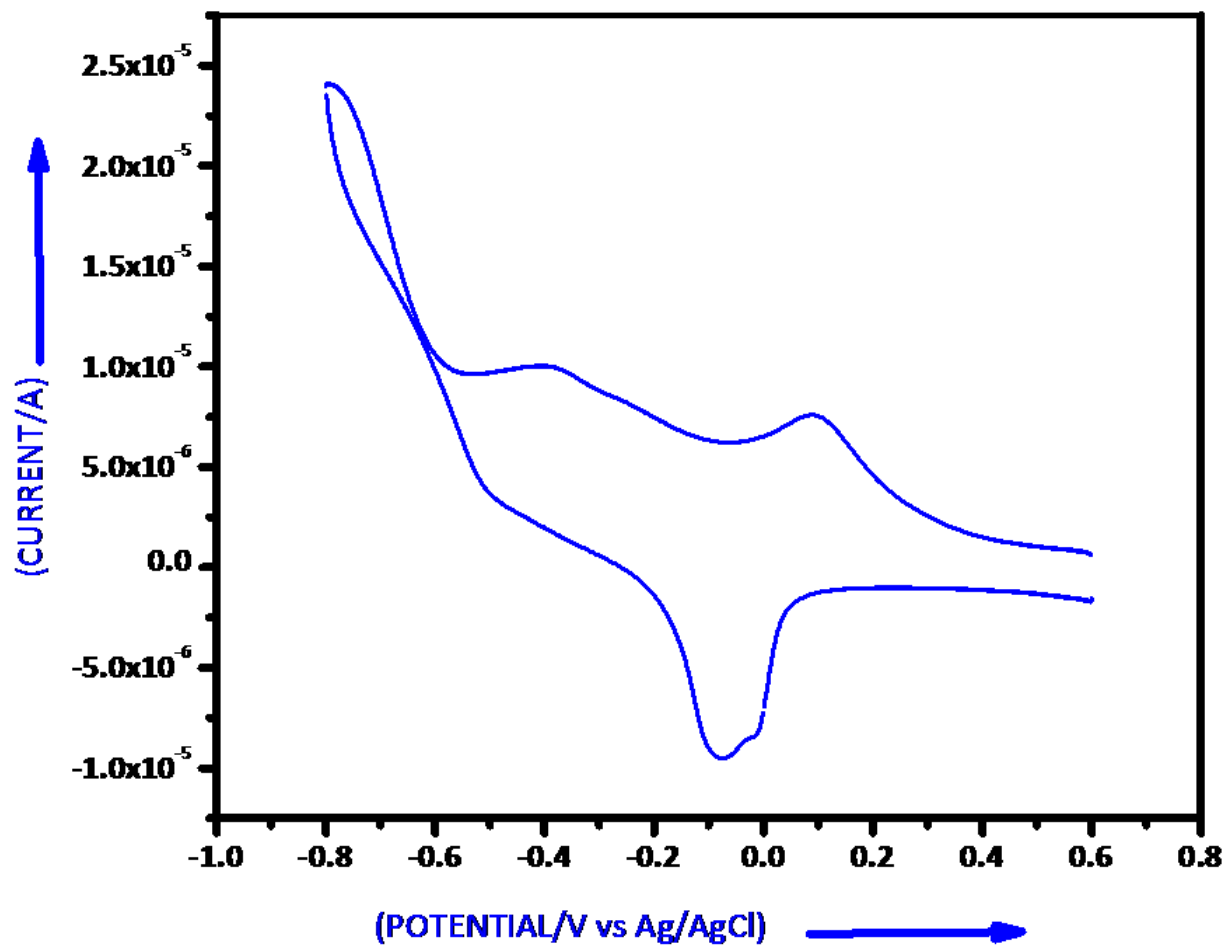

**Figure S29.** Cyclic voltammogram of complex **1** at the GC electrode in **Acetonitrile** medium at  $100 \text{ mV s}^{-1}$  scan rate.

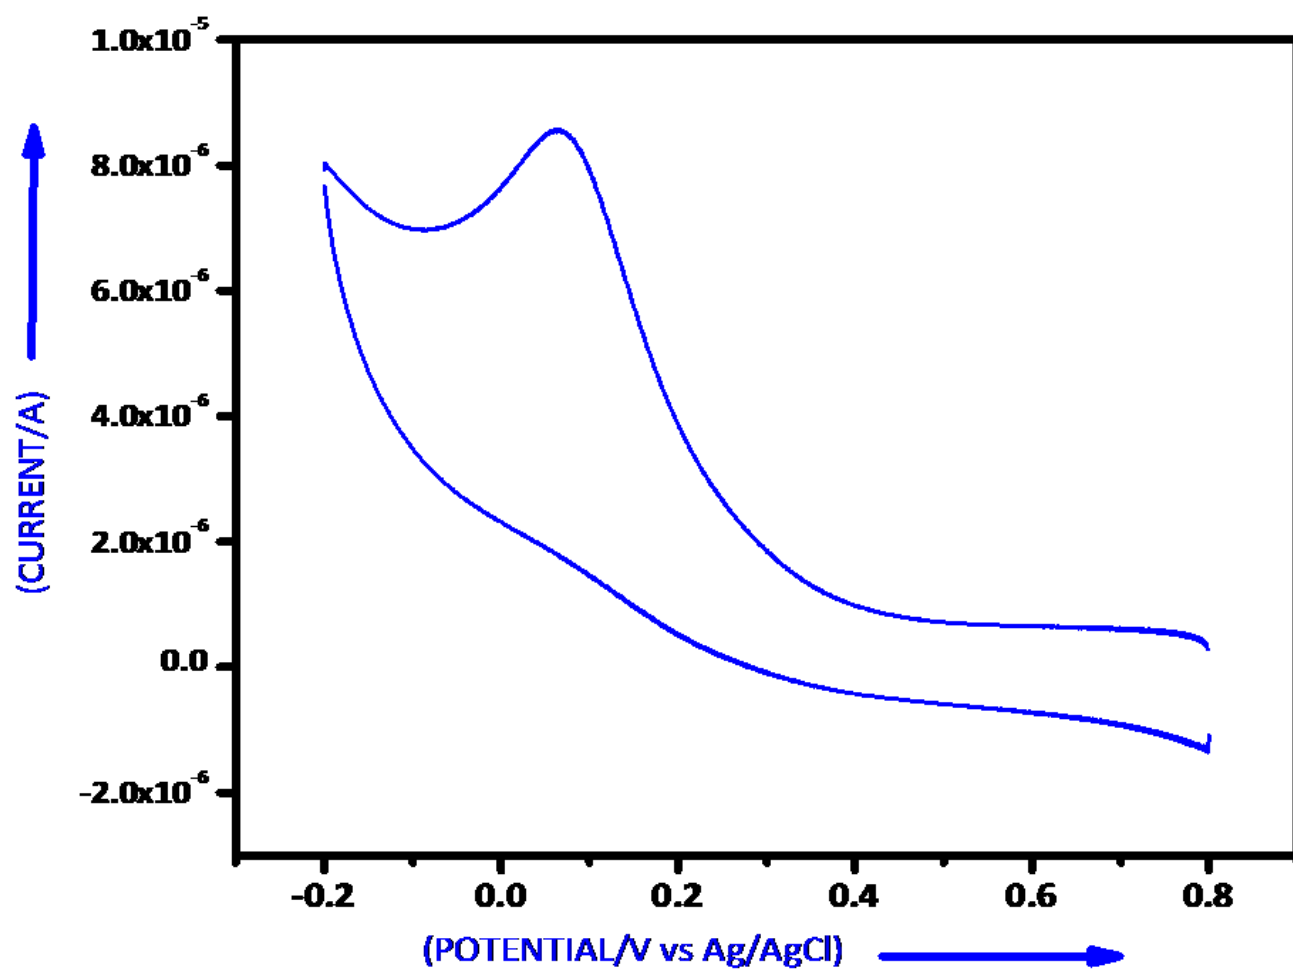

**Figure S30.** Cyclic voltammogram of complex **1** at the GC electrode in acetonitrile medium at  $100 \text{ mVs}^{-1}$  scan rate.

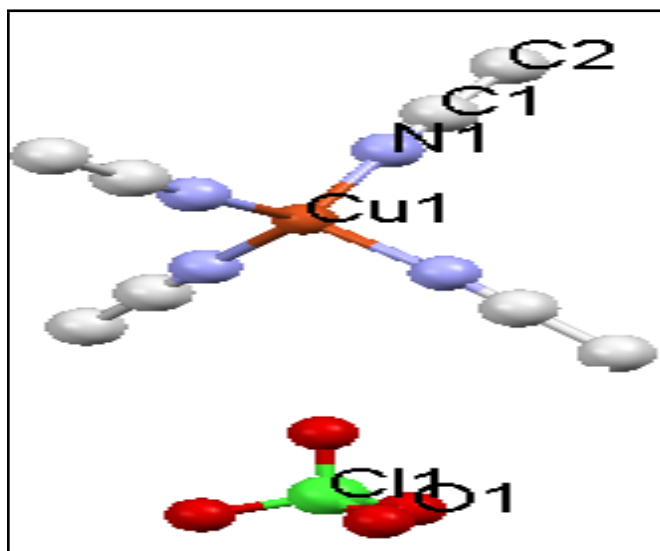

**Figure S31.** ORTEP drawing (ellipsoid probability 30%) of Cu(MeCN)<sub>4</sub>(ClO<sub>4</sub>) ( All atoms are not labeled for sake of clarity).
